# Supplementary material
Source: PubMed Central journal article supplement (PMC2330165)
Supplement: NIHMS45754-supplement-01.pdf [file NIHMS45754-supplement-01.pdf]

## Supporting Information

### Synthesis and Biological Evaluation of 2-alkylaminoethyl-1,1-bisphosphonic acids against *Trypanosoma cruzi* and *Toxoplasma gondii* targeting Farnesyl Diphosphate Synthase

Sergio H. Szajnman,<sup>a</sup> Guadalupe E. García Liñares,<sup>a</sup> Zhu-Hong Li,<sup>b</sup> Melina Galizzi,<sup>b</sup> Cuiying Jiang,<sup>b</sup> Esteban Bontempi,<sup>c</sup> Marcela Ferella,<sup>b</sup> Silvia N. J. Moreno,<sup>b</sup> Roberto Docampo,<sup>b</sup> and Juan B. Rodríguez<sup>a,\*</sup>

<sup>a</sup>*Departamento de Química Orgánica and UMYMFOR (CONICET–FCEyN), Facultad de Ciencias Exactas y Naturales, Universidad de Buenos Aires, Pabellón 2, Ciudad Universitaria, C1428EHA, Buenos Aires, Argentina,* <sup>b</sup>*Center for Tropical and Emerging Global Diseases and Department of Cellular Biology, University of Georgia, Athens, Georgia, 30602, U.S.A., and* <sup>c</sup>*Instituto Nacional de Parasitología, Dr. Mario Fátala Chabén, Administración Nacional de Laboratorios e Institutos de Salud, Ministerio de Salud, Buenos Aires, C1063ACT, Argentina*

#### List of Contents

|                                                     |    |
|-----------------------------------------------------|----|
| <sup>1</sup> H-NMR spectrum for compound <b>14</b>  | 3  |
| <sup>13</sup> C-NMR spectrum for compound <b>14</b> | 3  |
| <sup>31</sup> P-NMR spectrum for compound <b>14</b> | 4  |
| <sup>1</sup> H-NMR spectrum for compound <b>15</b>  | 4  |
| <sup>13</sup> C-NMR spectrum for compound <b>15</b> | 5  |
| <sup>31</sup> P-NMR spectrum for compound <b>15</b> | 5  |
| <sup>1</sup> H-NMR spectrum for compound <b>16</b>  | 6  |
| <sup>13</sup> C-NMR spectrum for compound <b>16</b> | 6  |
| <sup>31</sup> P-NMR spectrum for compound <b>16</b> | 7  |
| <sup>1</sup> H-NMR spectrum for compound <b>17</b>  | 7  |
| <sup>13</sup> C-NMR spectrum for compound <b>17</b> | 8  |
| <sup>31</sup> P-NMR spectrum for compound <b>17</b> | 8  |
| <sup>1</sup> H-NMR spectrum for compound <b>18</b>  | 9  |
| <sup>13</sup> C-NMR spectrum for compound <b>18</b> | 9  |
| <sup>31</sup> P-NMR spectrum for compound <b>18</b> | 10 |
| <sup>1</sup> H-NMR spectrum for compound <b>19</b>  | 10 |
| <sup>13</sup> C-NMR spectrum for compound <b>19</b> | 11 |
| <sup>31</sup> P-NMR spectrum for compound <b>19</b> | 11 |

|                                                     |    |
|-----------------------------------------------------|----|
| <sup>1</sup> H-NMR spectrum for compound <b>20</b>  | 12 |
| <sup>13</sup> C-NMR spectrum for compound <b>20</b> | 12 |
| <sup>31</sup> P-NMR spectrum for compound <b>20</b> | 13 |
| <sup>1</sup> H-NMR spectrum for compound <b>21</b>  | 13 |
| <sup>13</sup> C-NMR spectrum for compound <b>21</b> | 14 |
| <sup>31</sup> P-NMR spectrum for compound <b>21</b> | 14 |
| <sup>1</sup> H-NMR spectrum for compound <b>22</b>  | 15 |
| <sup>13</sup> C-NMR spectrum for compound <b>22</b> | 15 |
| <sup>31</sup> P-NMR spectrum for compound <b>22</b> | 16 |
| <sup>1</sup> H-NMR spectrum for compound <b>23</b>  | 16 |
| <sup>13</sup> C-NMR spectrum for compound <b>23</b> | 17 |
| <sup>31</sup> P-NMR spectrum for compound <b>23</b> | 17 |
| <sup>1</sup> H-NMR spectrum for compound <b>24</b>  | 18 |
| <sup>13</sup> C-NMR spectrum for compound <b>24</b> | 18 |
| <sup>31</sup> P-NMR spectrum for compound <b>24</b> | 19 |
| <sup>1</sup> H-NMR spectrum for compound <b>25</b>  | 19 |
| <sup>13</sup> C-NMR spectrum for compound <b>25</b> | 20 |
| <sup>31</sup> P-NMR spectrum for compound <b>25</b> | 20 |
| <sup>1</sup> H-NMR spectrum for compound <b>26</b>  | 21 |
| <sup>13</sup> C-NMR spectrum for compound <b>26</b> | 21 |
| <sup>31</sup> P-NMR spectrum for compound <b>26</b> | 22 |
| <sup>1</sup> H-NMR spectrum for compound <b>27</b>  | 22 |
| <sup>13</sup> C-NMR spectrum for compound <b>27</b> | 23 |
| <sup>31</sup> P-NMR spectrum for compound <b>27</b> | 23 |
| Copy of elemental analysis of <b>14</b>             | 24 |
| Copy of elemental analysis of <b>15</b>             | 24 |
| Copy of elemental analysis of <b>16</b>             | 25 |
| Copy of elemental analysis of <b>17</b>             | 25 |
| Copy of elemental analysis of <b>18</b>             | 26 |
| Copy of elemental analysis of <b>19</b>             | 26 |
| Copy of elemental analysis of <b>20</b>             | 27 |
| Copy of elemental analysis of <b>21</b>             | 27 |
| Copy of elemental analysis of <b>22</b>             | 28 |
| Copy of elemental analysis of <b>23</b>             | 28 |
| Copy of elemental analysis of <b>24</b>             | 29 |
| Copy of elemental analysis of <b>25</b>             | 29 |
| Copy of elemental analysis of <b>18</b>             | 30 |
| Copy of elemental analysis of <b>19</b>             | 30 |

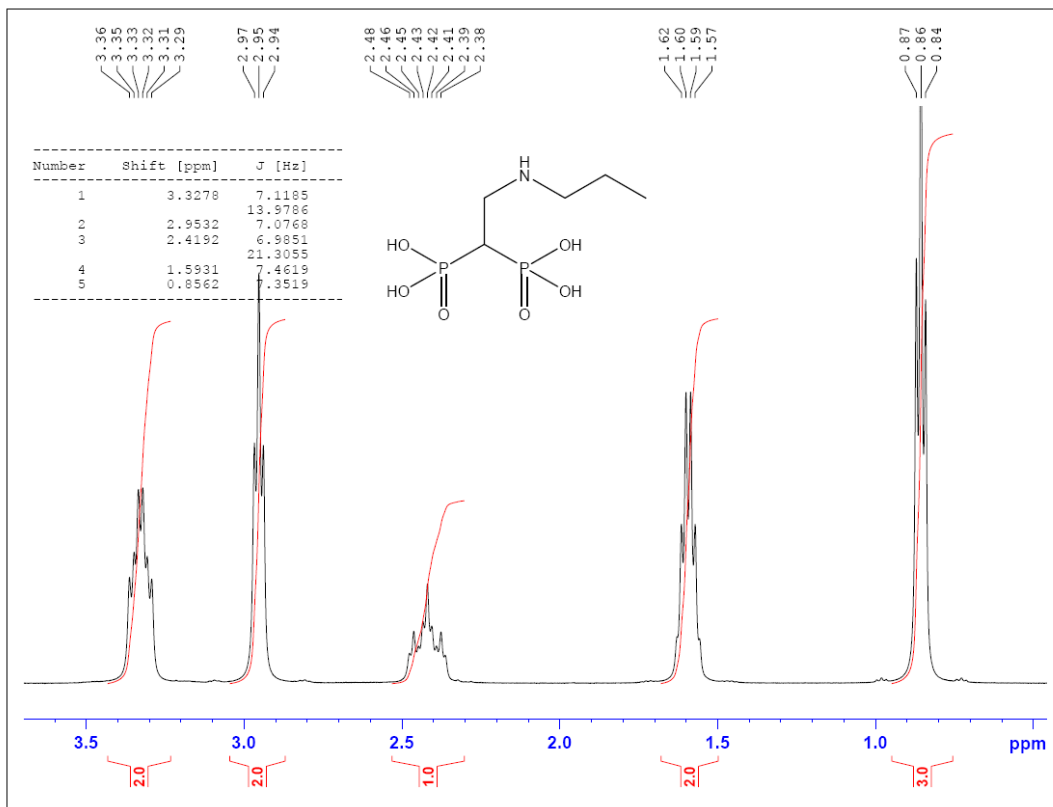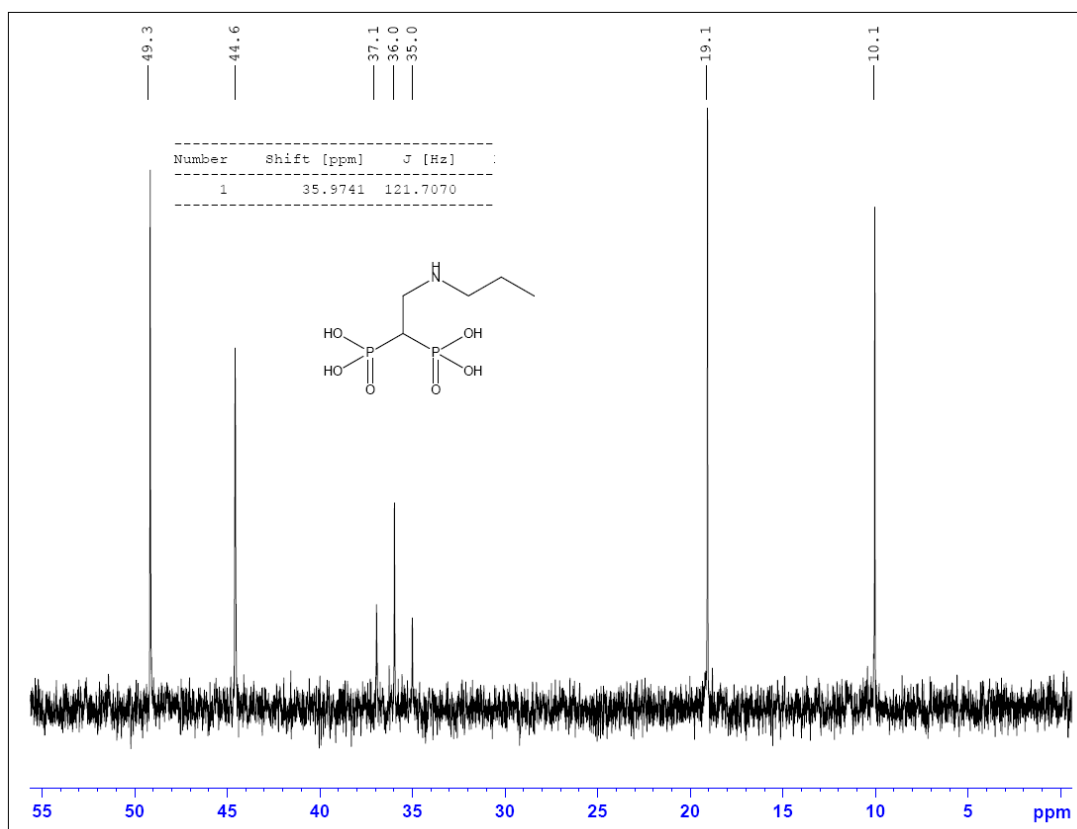

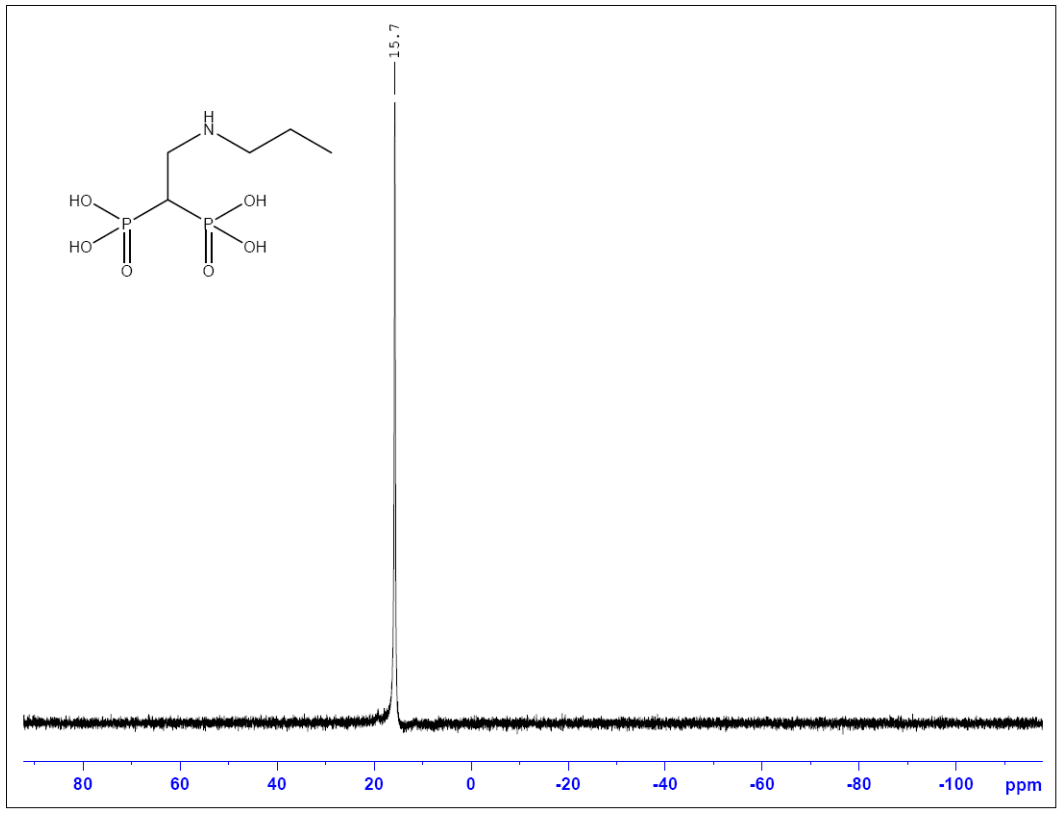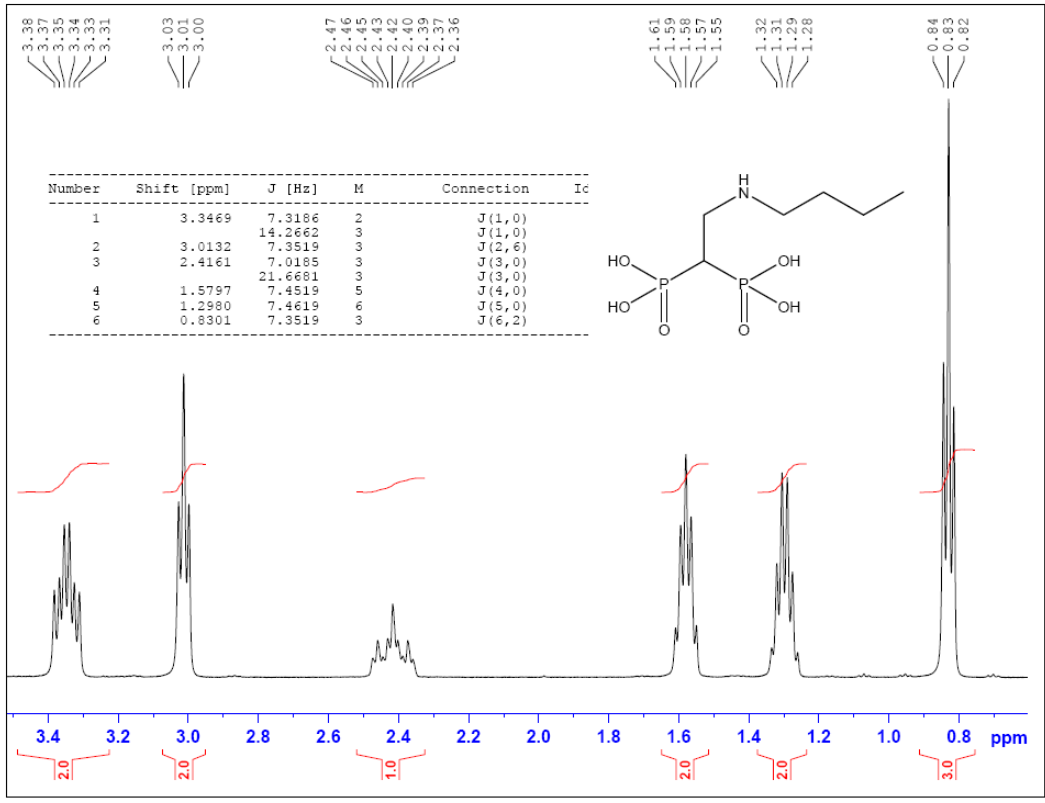

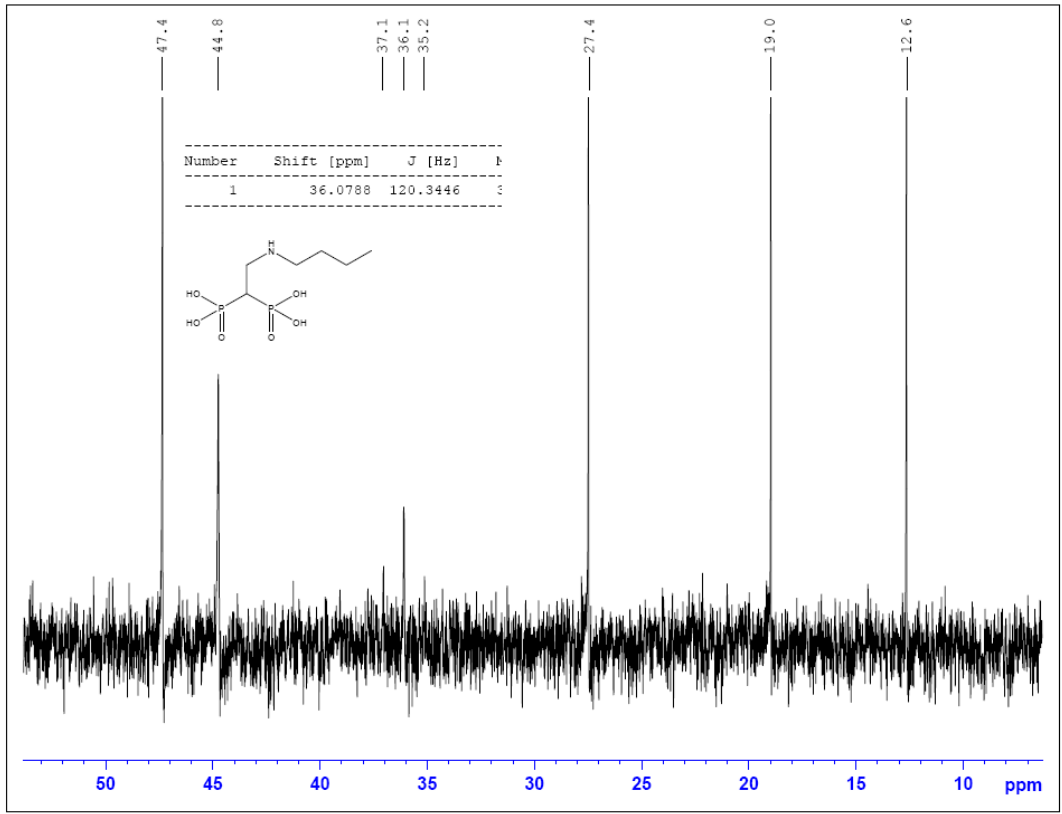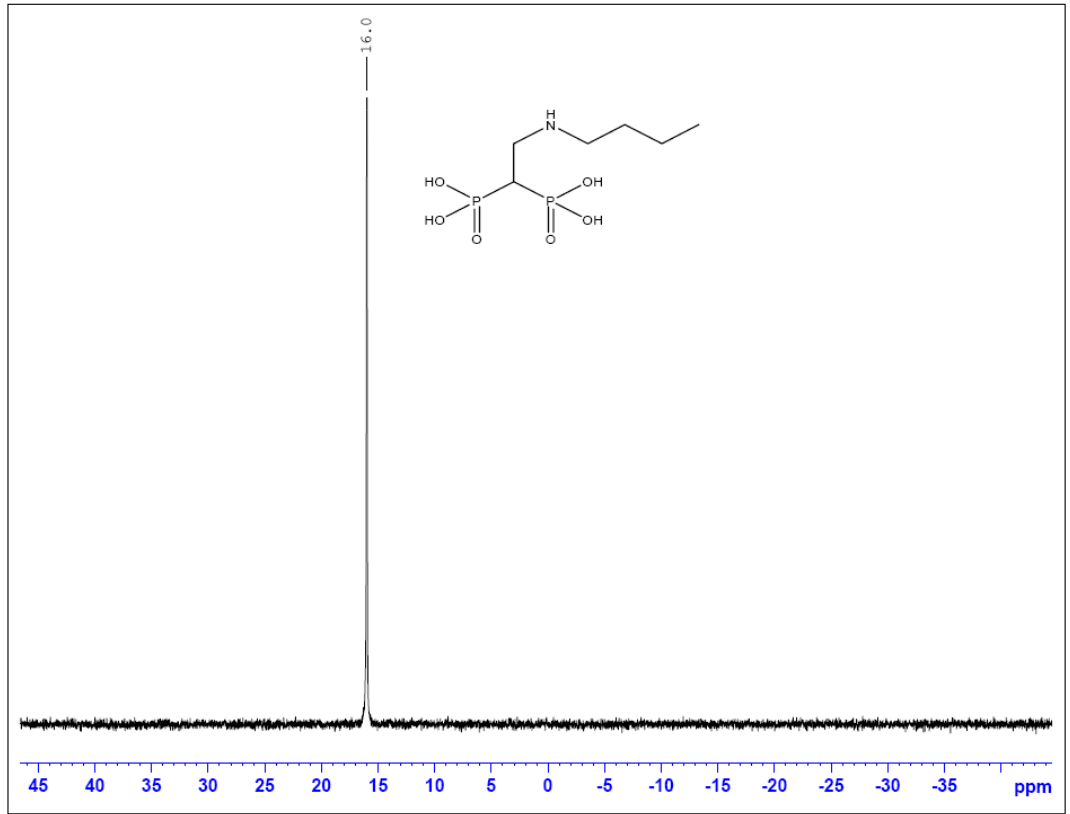

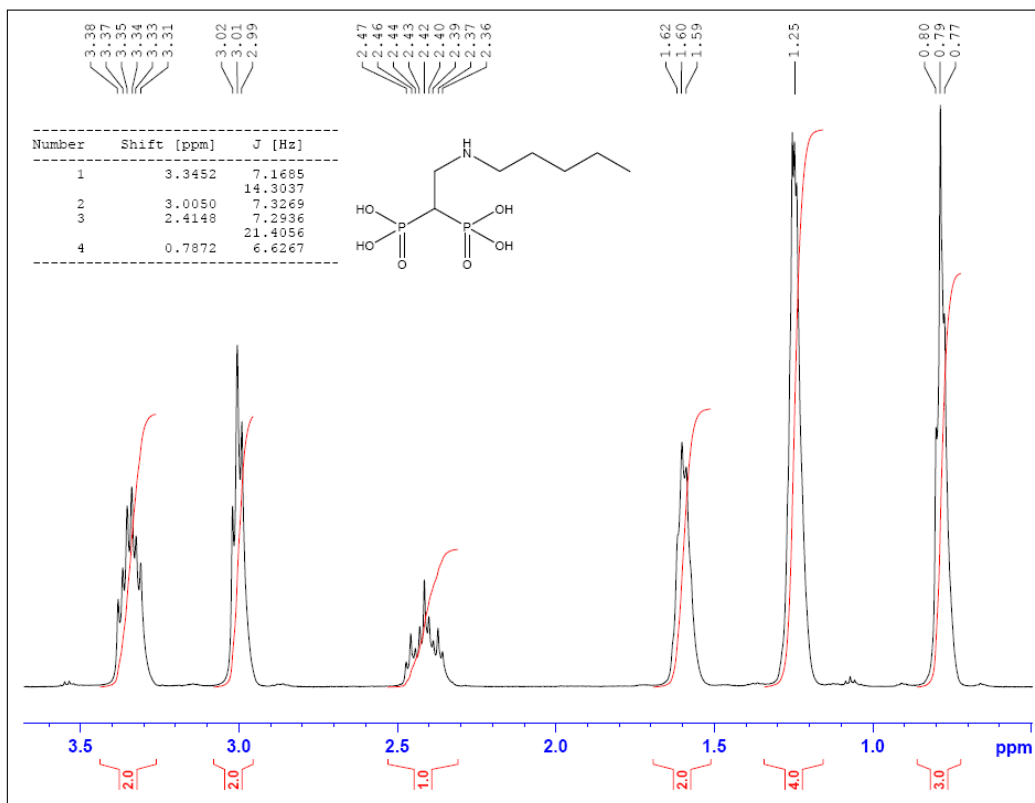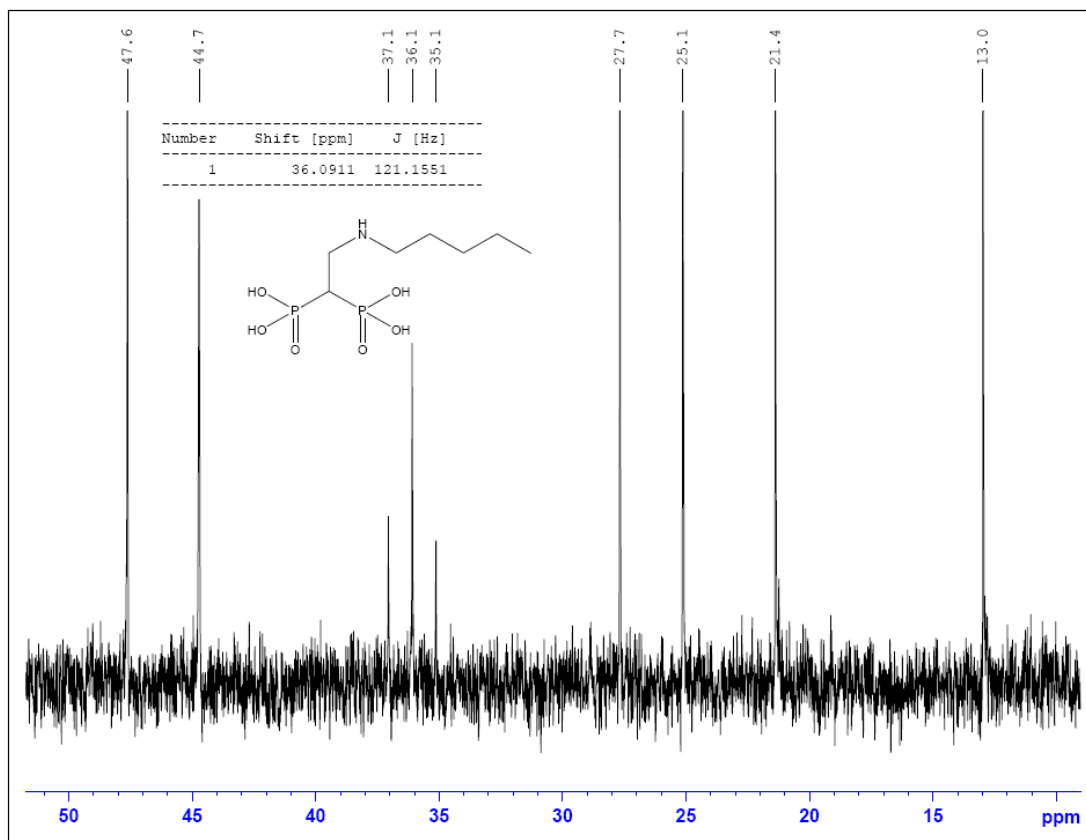

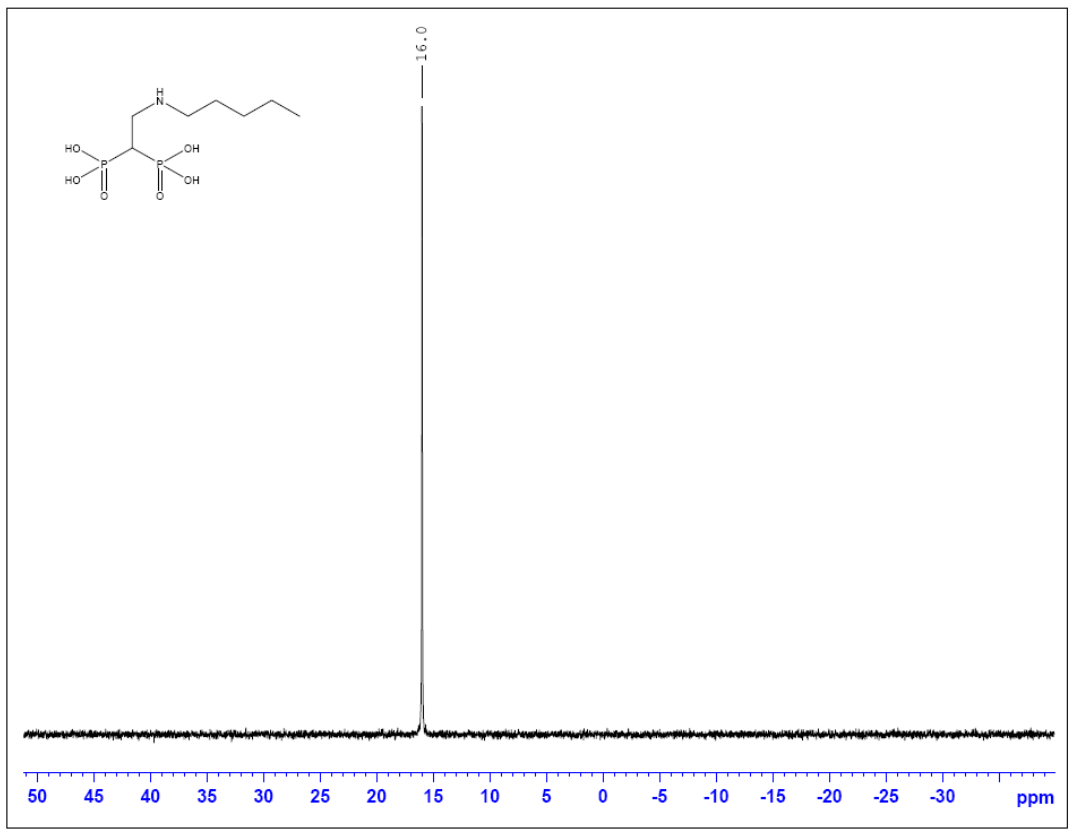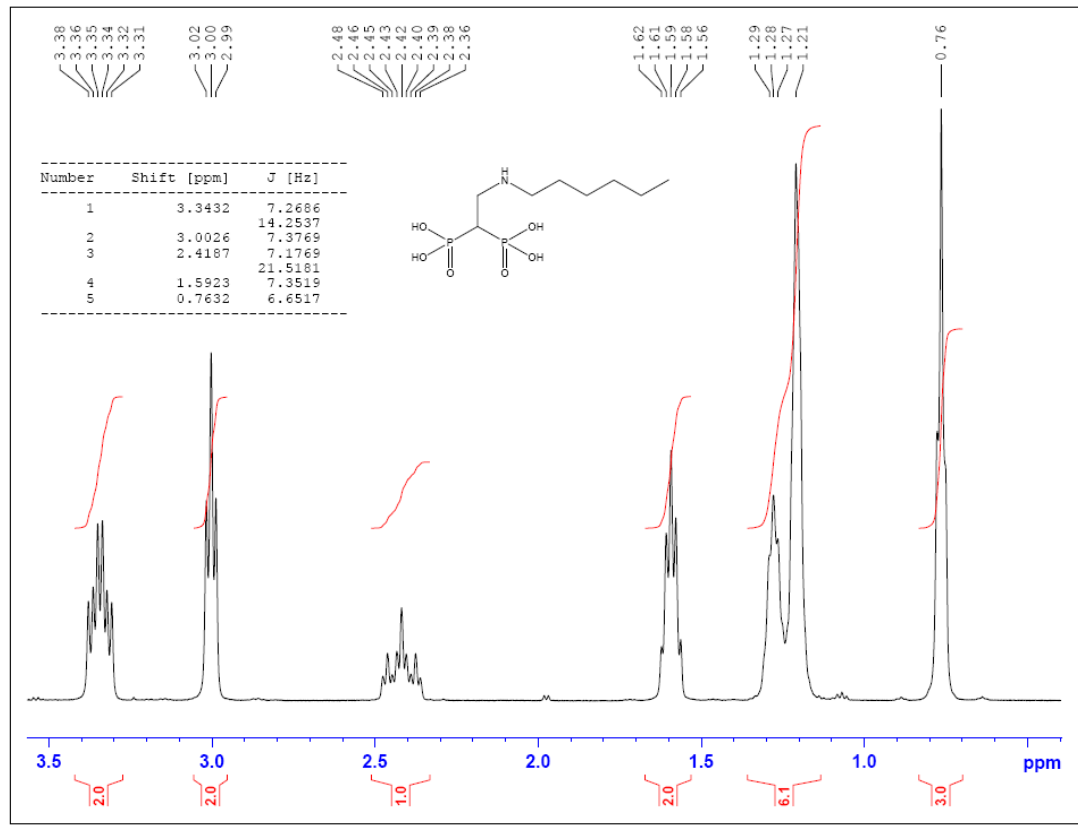

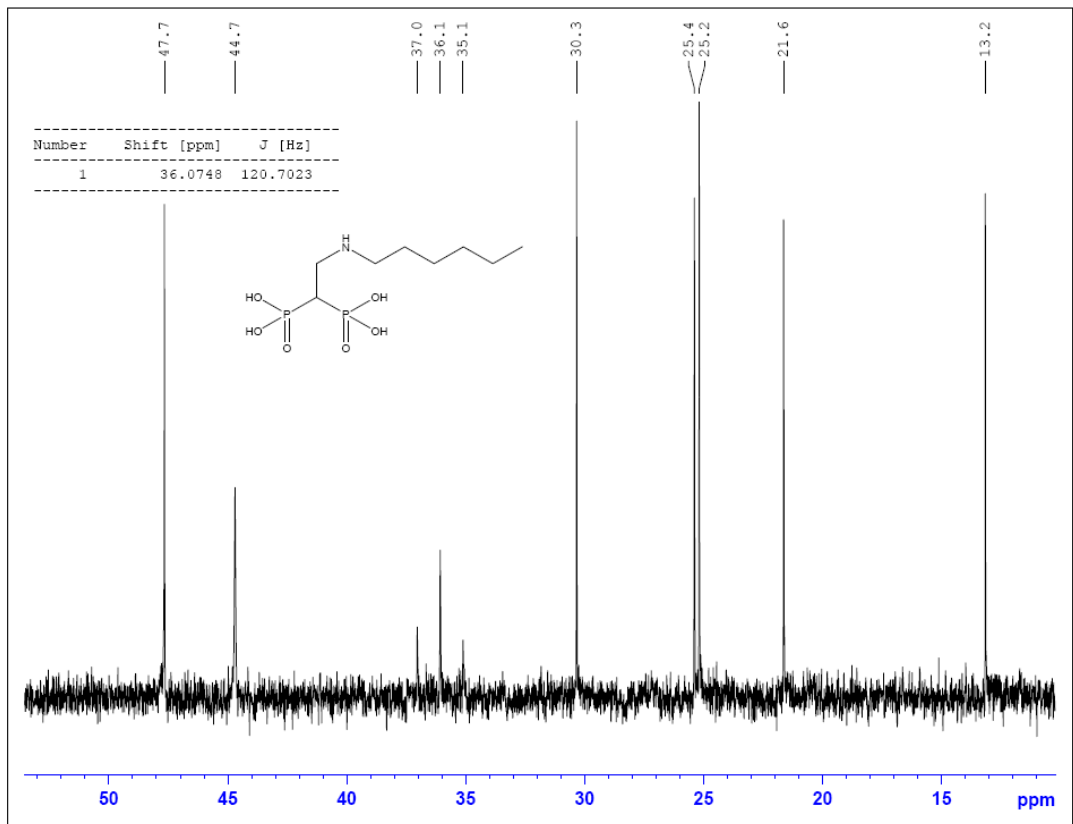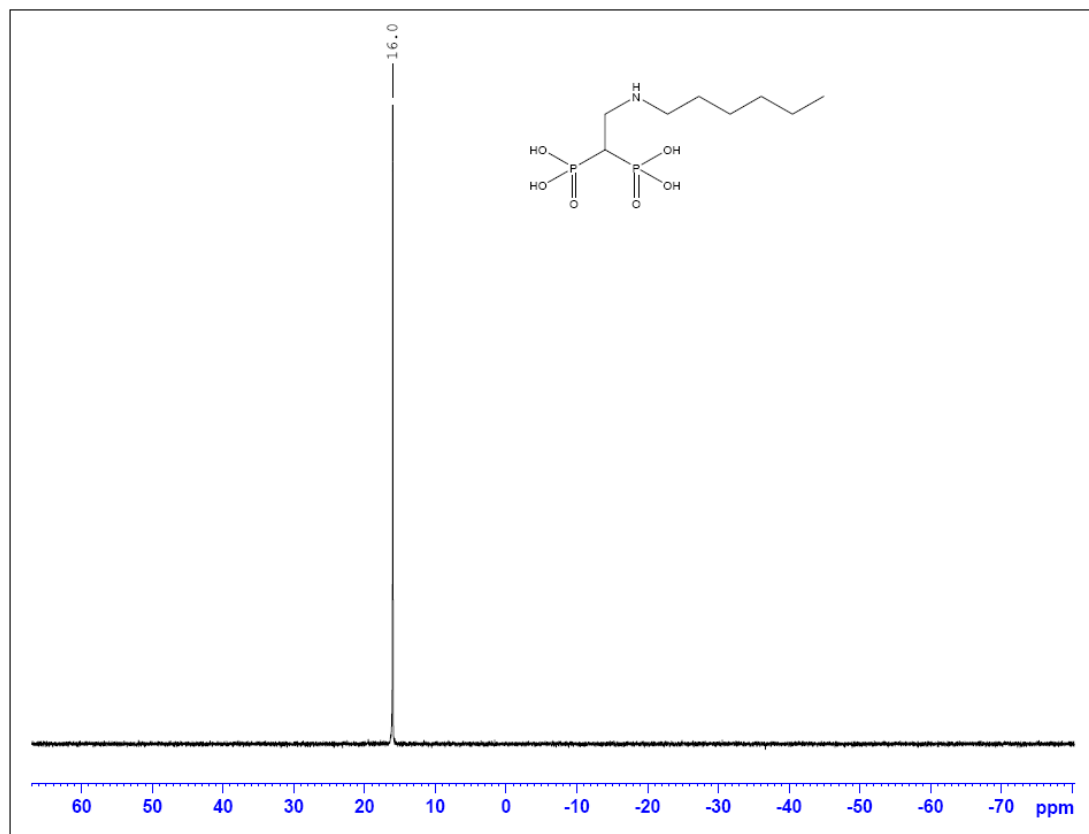



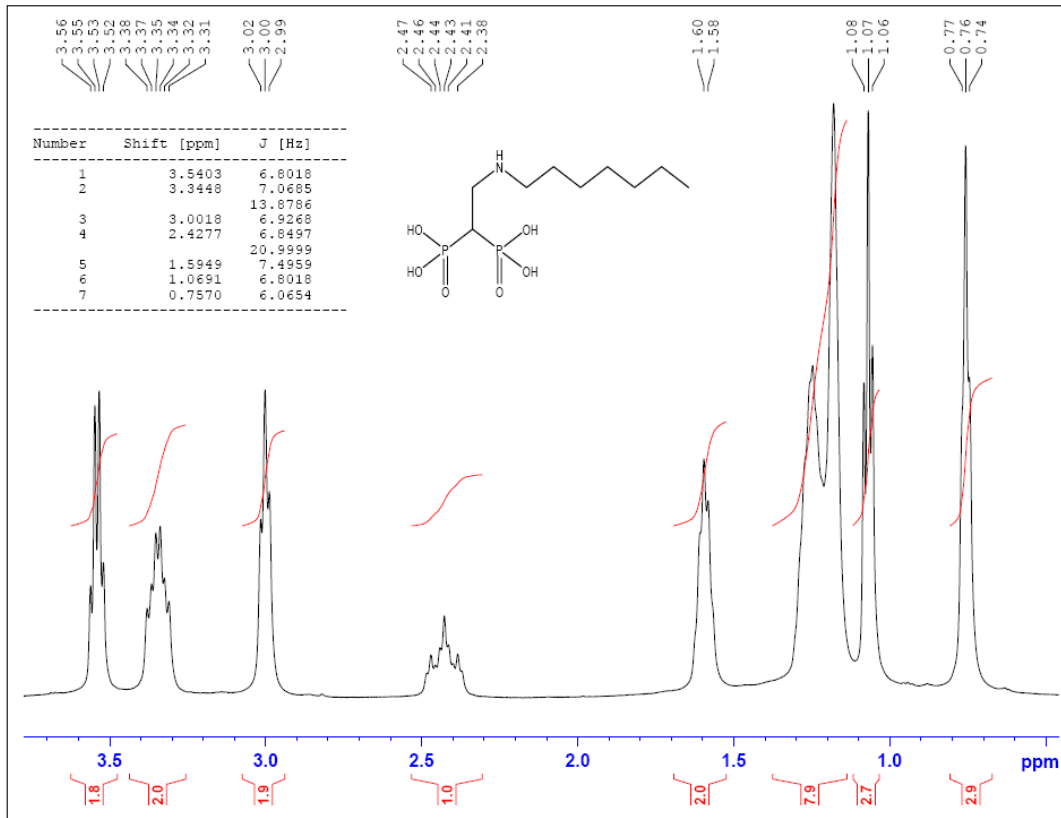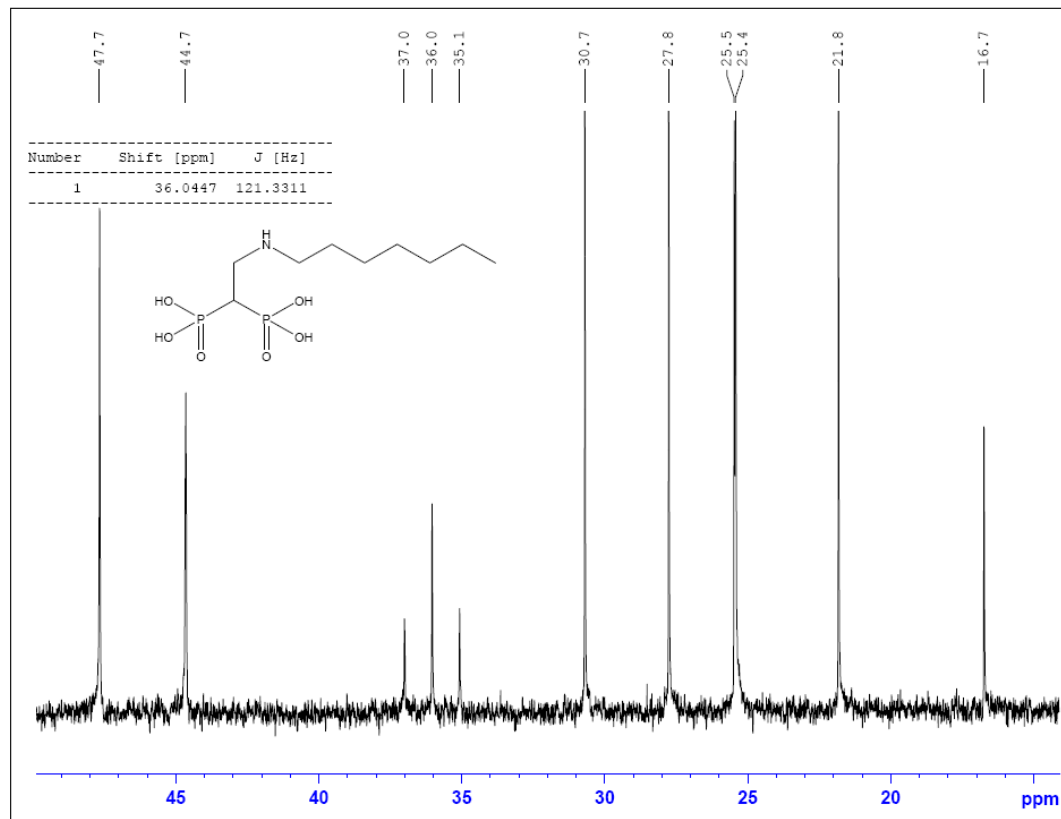

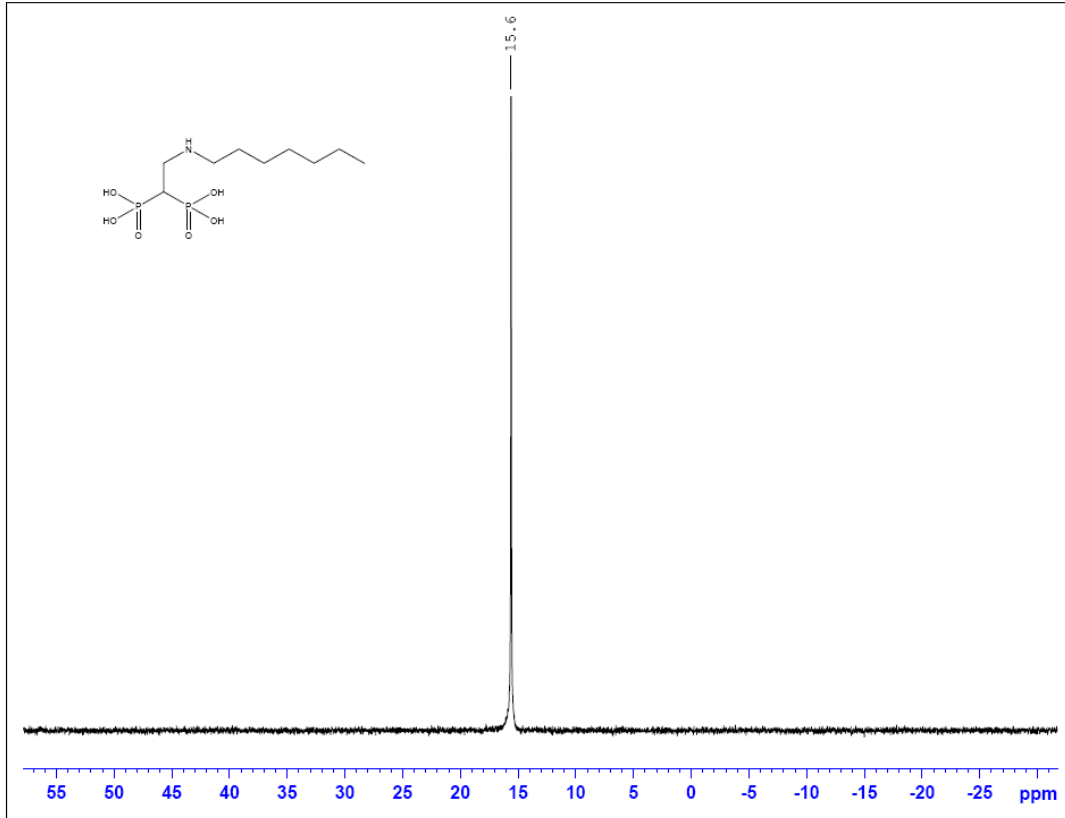

# BR-34 # Compoundf 19 //D2O// 1H 6/11/06.

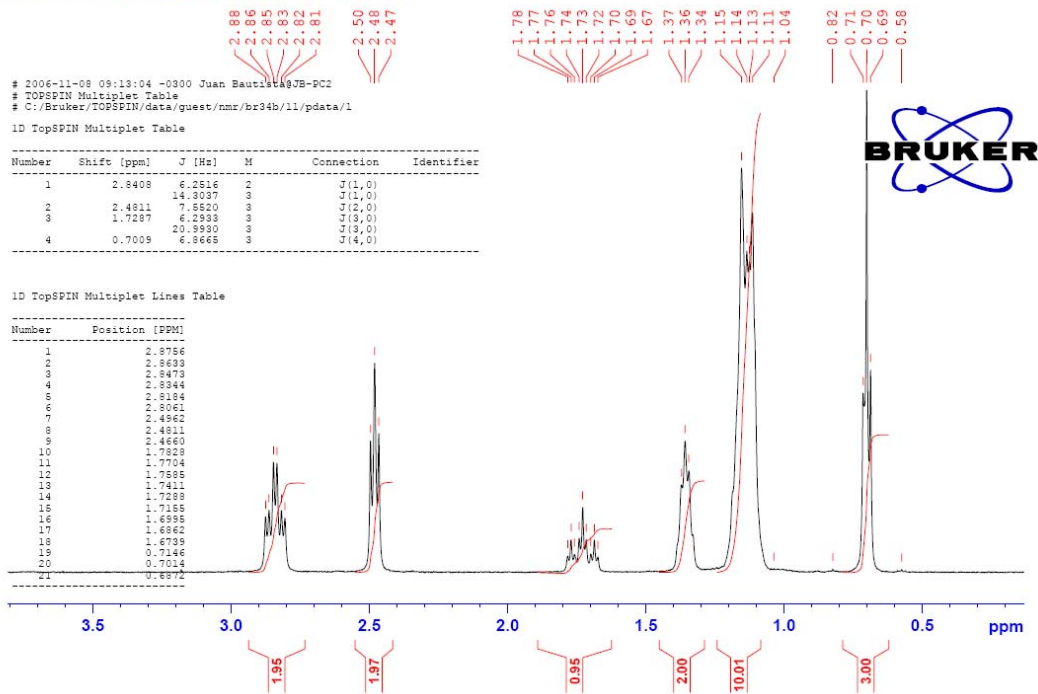

# BR-34 # // D2O // 13C\* 6 Nov 2006.

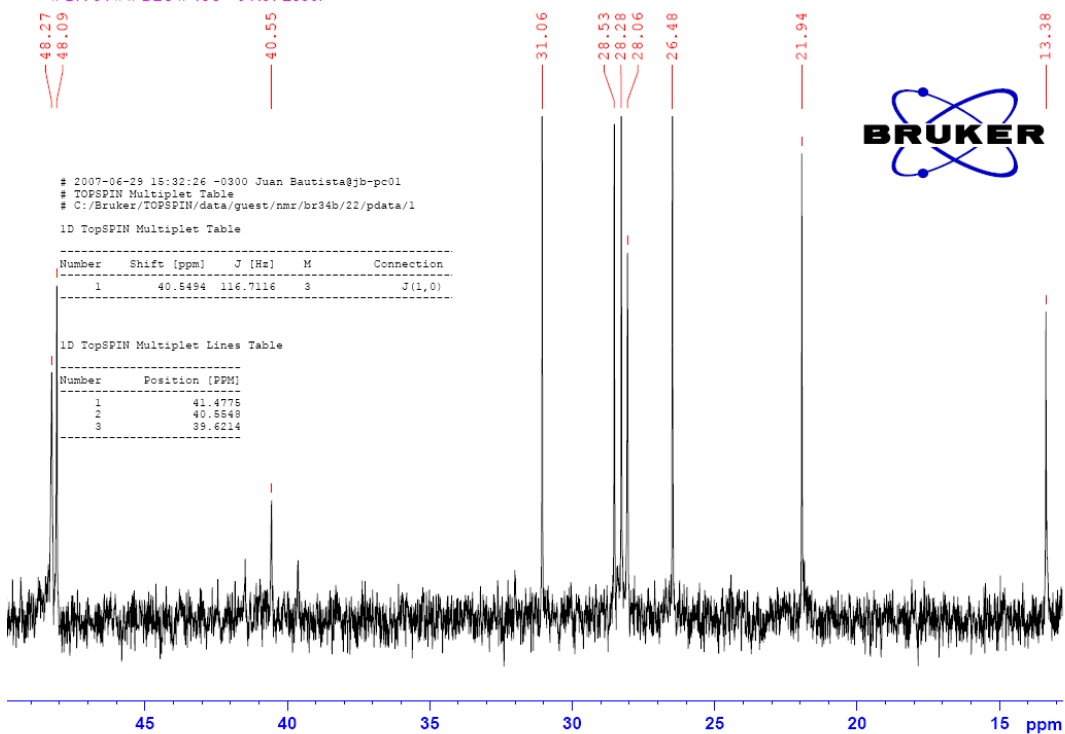

# BR-34 # //D2O// 31P 11 Nov 2006.

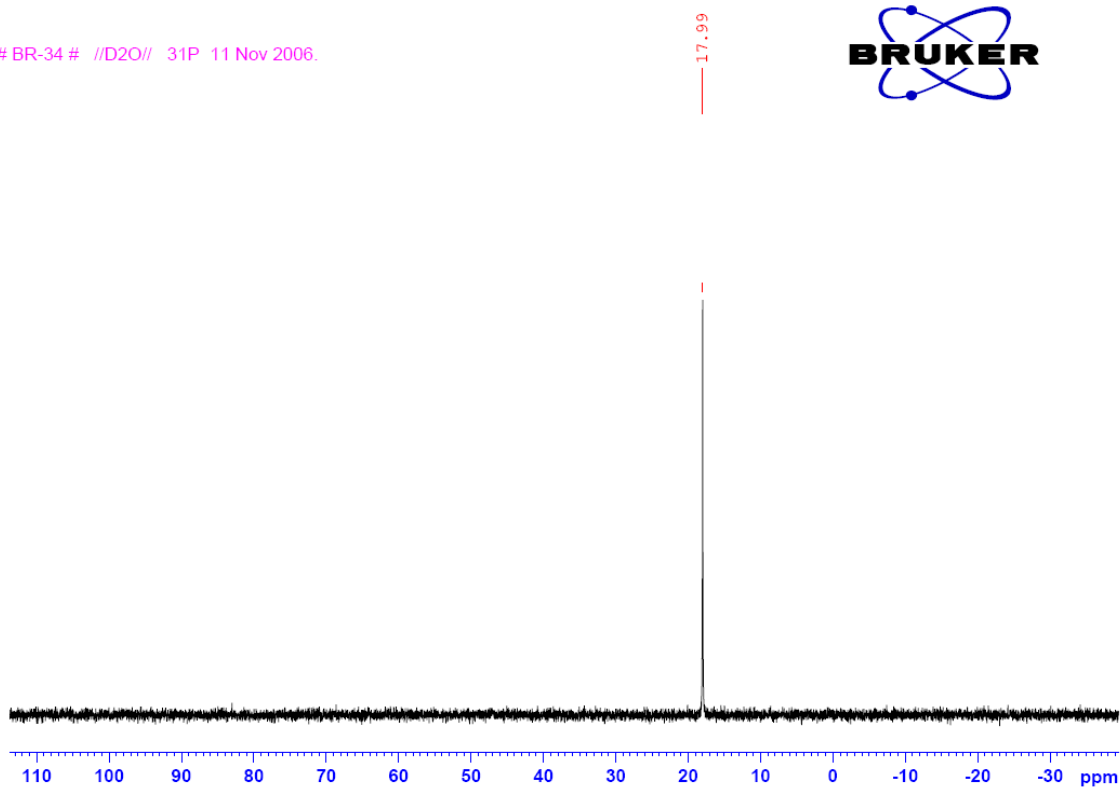



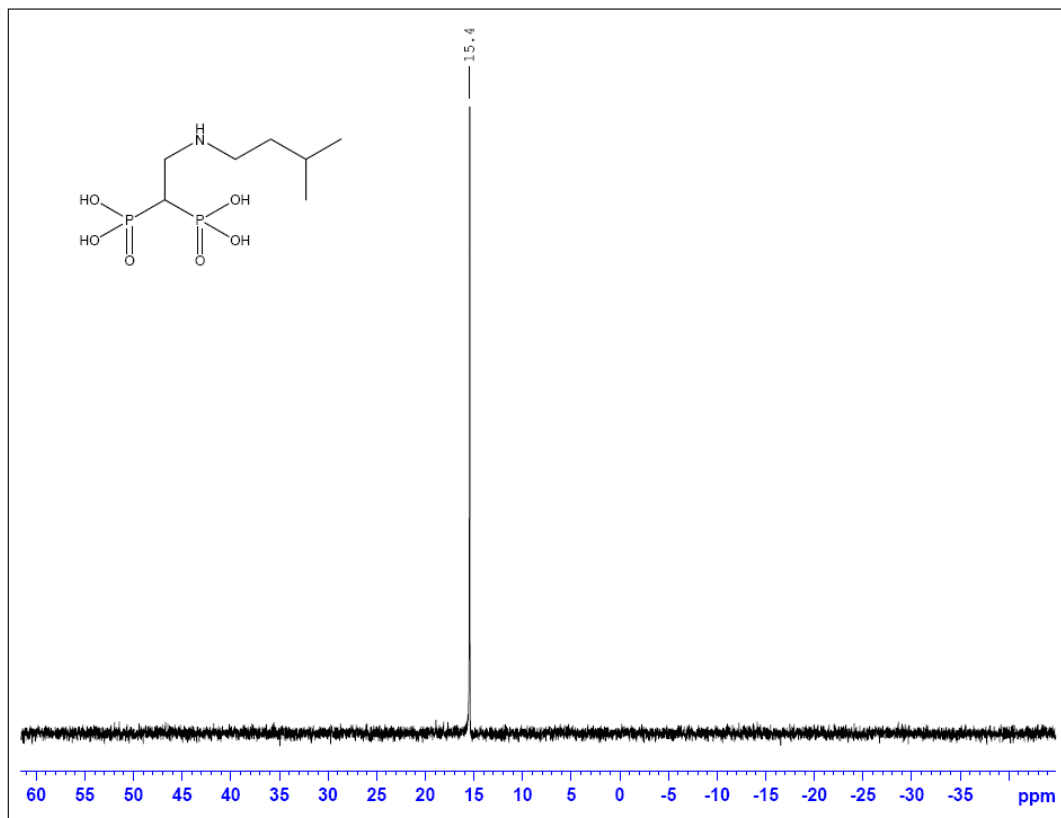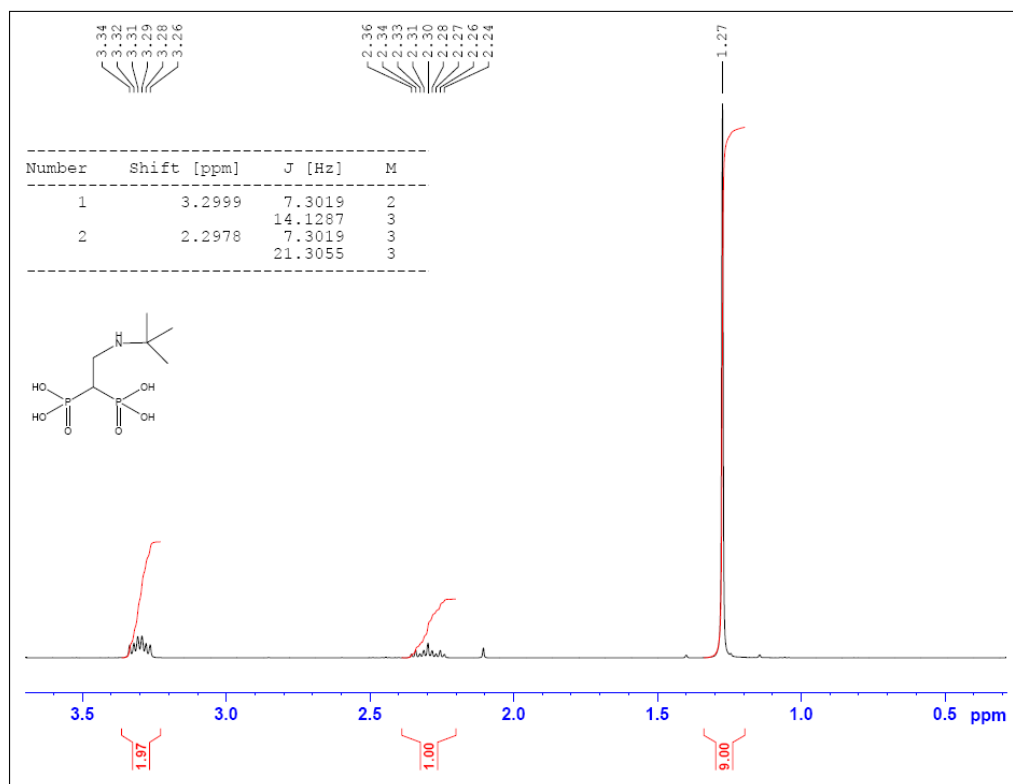

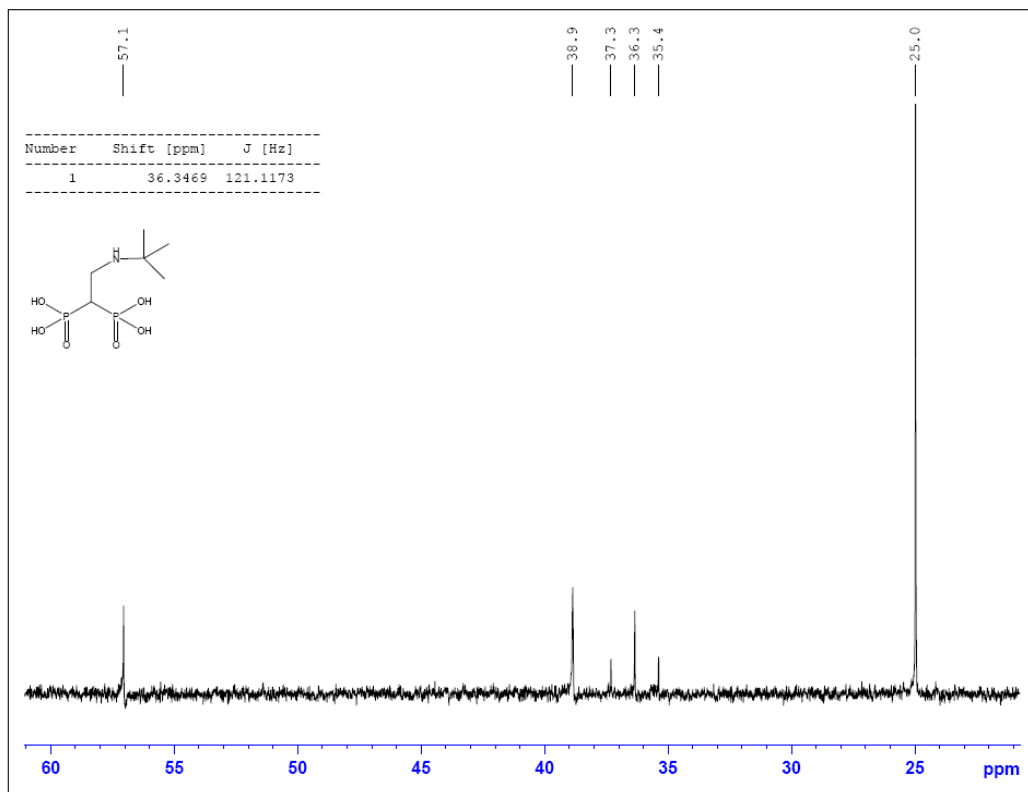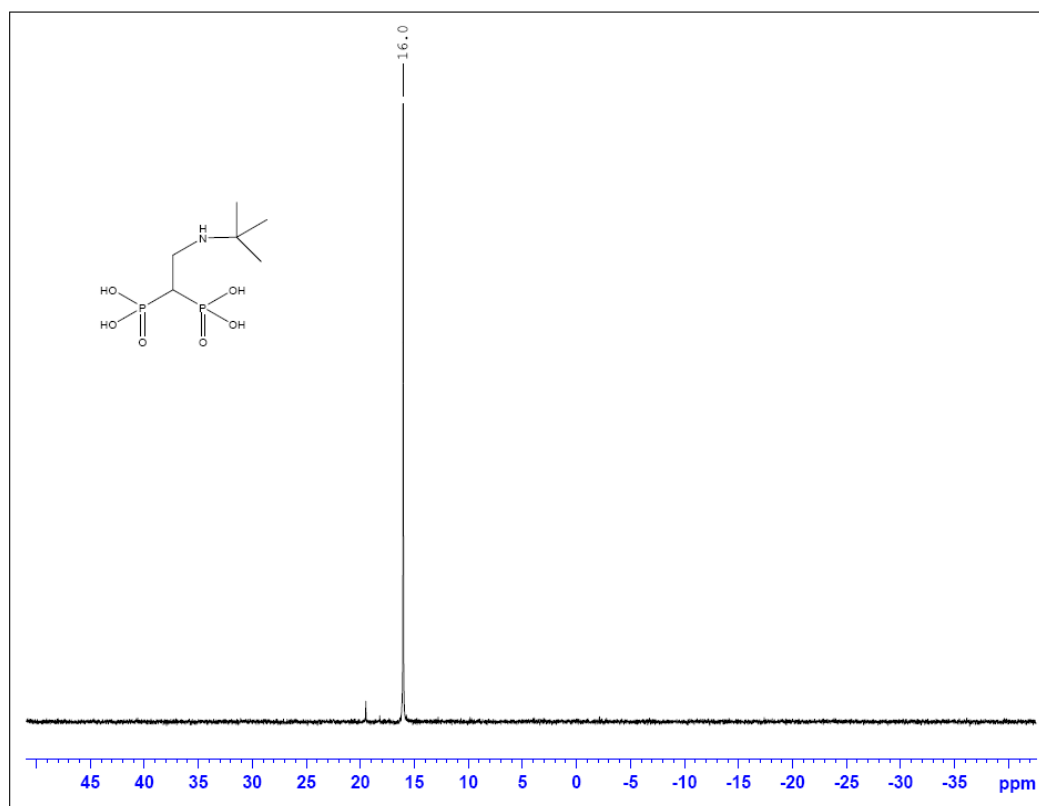

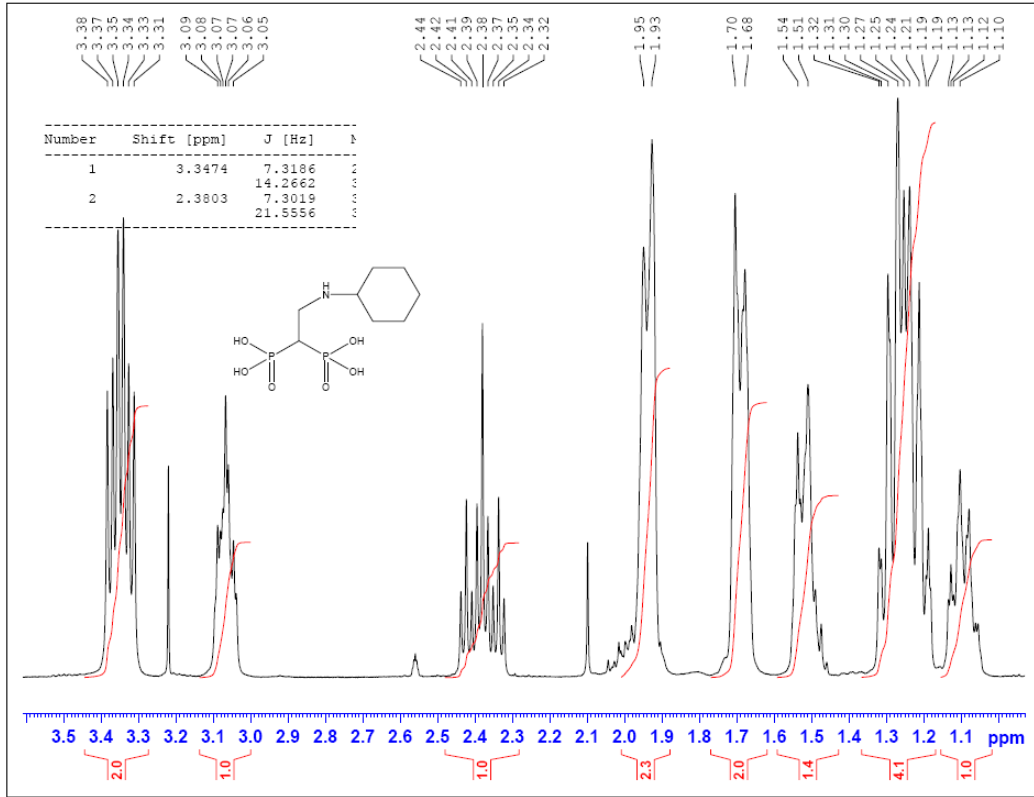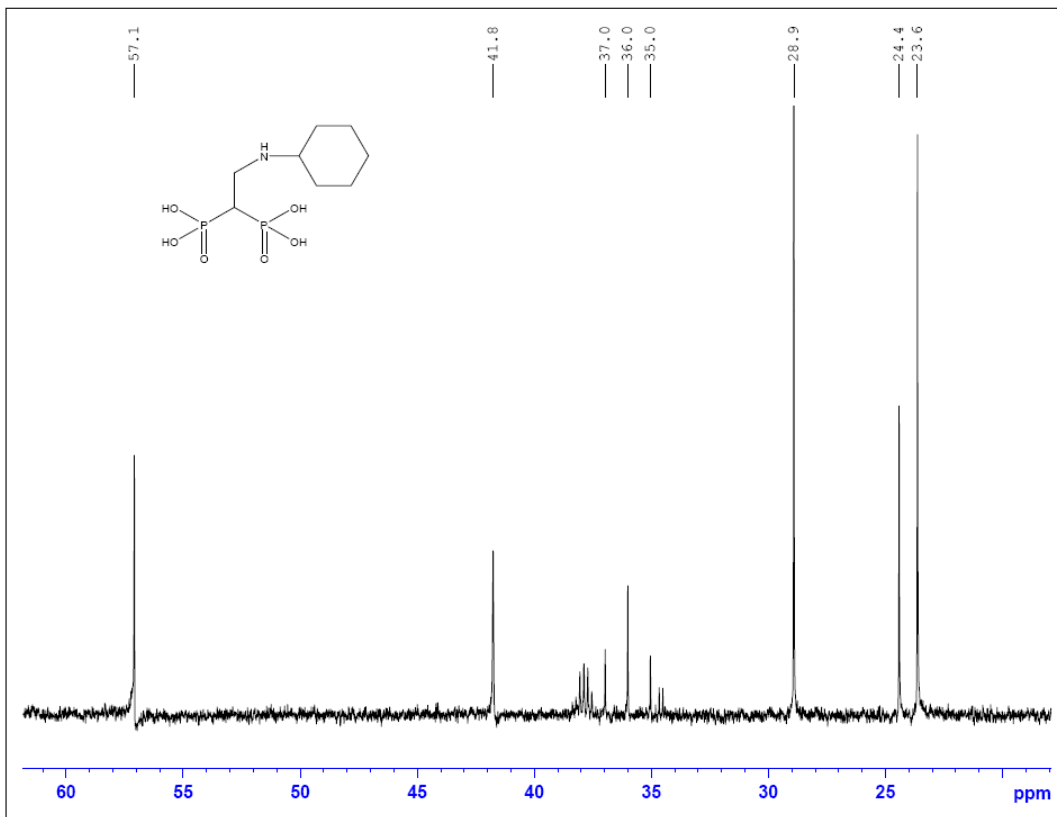

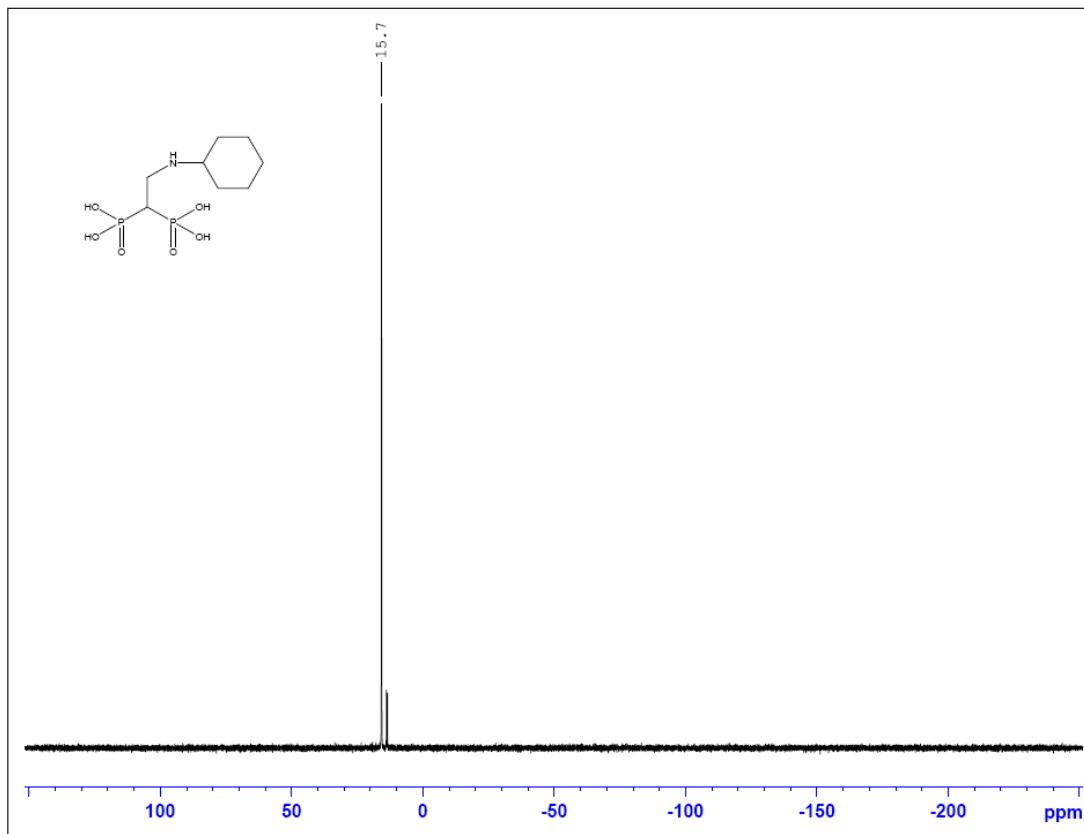

# BR-35 # Compound 23 //D2O//, (Juan-Dr.Rodriguez) , 1H 1/8/07

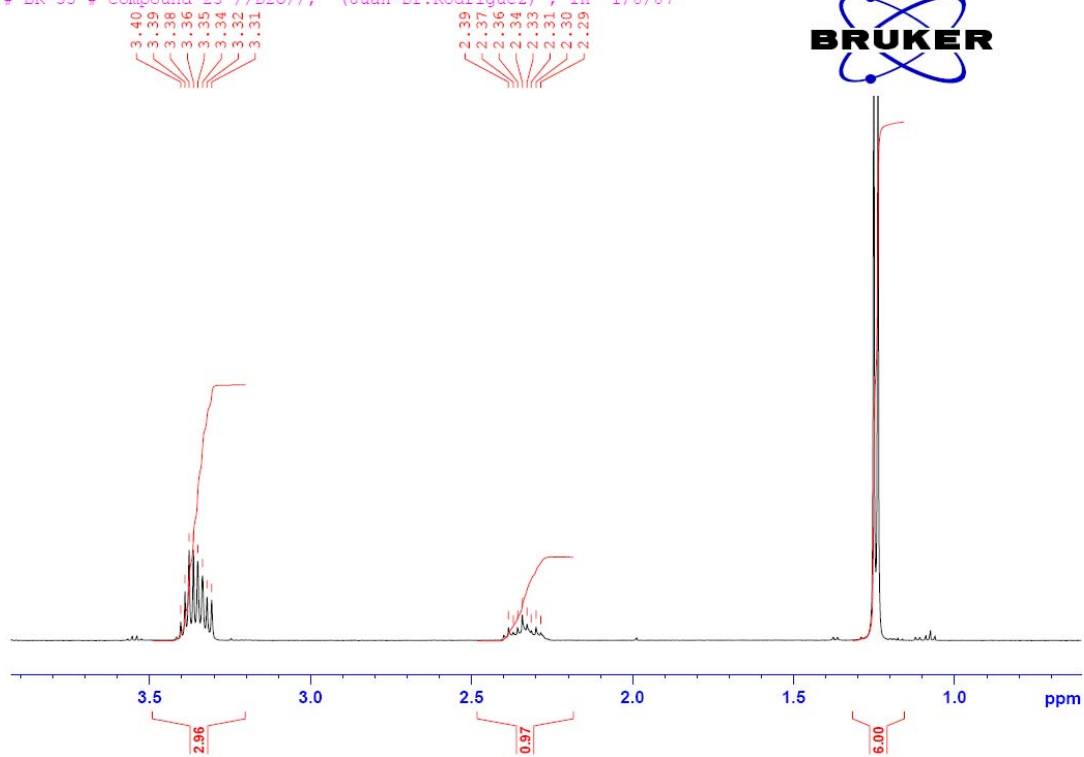





# BR-36 # //D2O// 1H RMN 9/2/2007

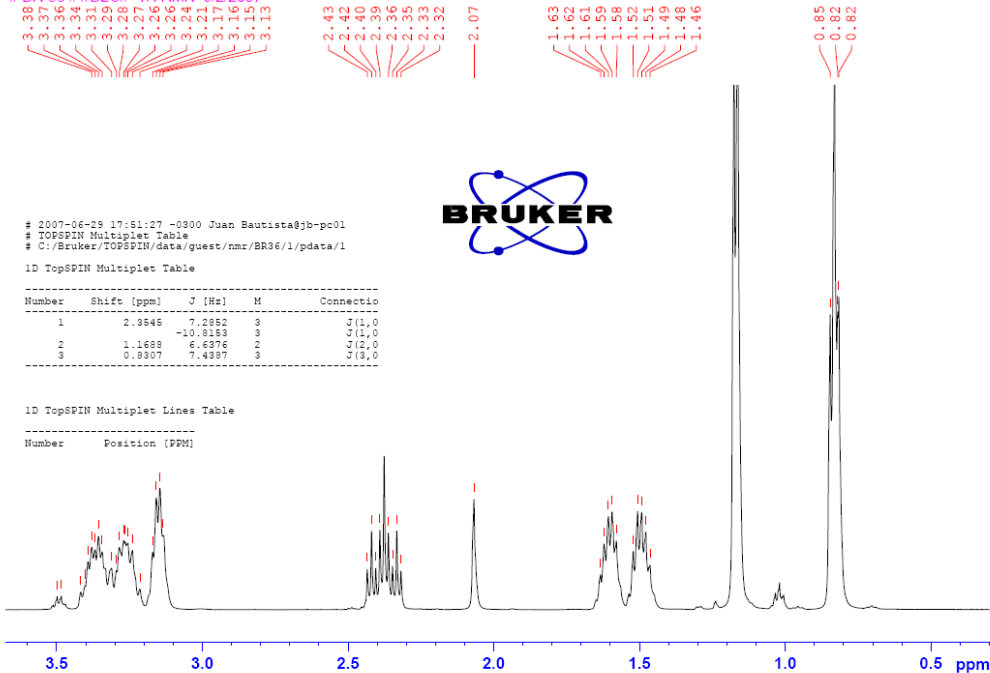

# BR-36 # //D2O//,Compound 24 13C NMR 1/8/07

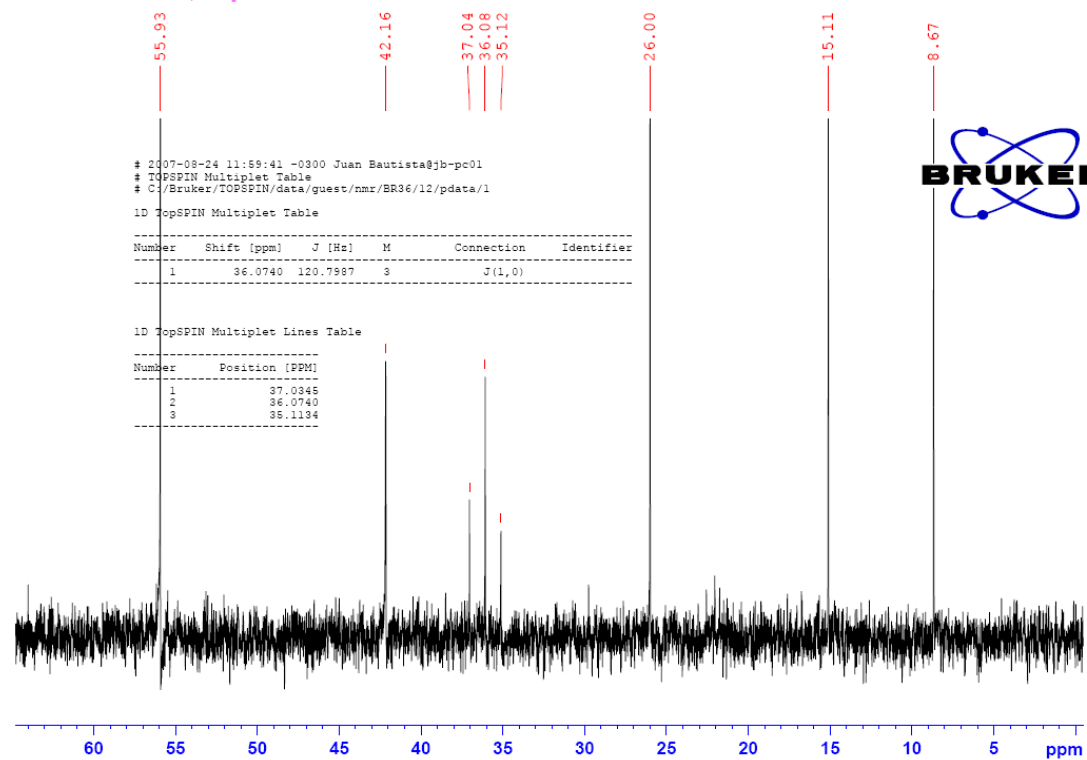

# BR-36 # Compound 24 //D2O// 31P RMN 9/2/2007

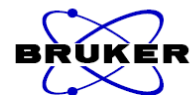

# 2007-08-24 12:33:42 -0300 Juan Bautista@jb-pc01  
# TOPSPIN Multiplet Table  
# C:/Bruker/TOPSPIN/data/guest/nmr/BR36/3/pdata/1

1D TopSPIN Multiplet Table

| Number | Shift [ppm] | J [Hz] | M | Connection | Identif |
|--------|-------------|--------|---|------------|---------|
| 1      | 16.2522     | 7.3899 | 2 | J(1,0)     |         |
| 2      | 16.1814     | 7.4706 | 2 | J(2,0)     |         |

1D TopSPIN Multiplet Lines Table

| Number | Position [PPM] |
|--------|----------------|
| 1      | 16.2704        |
| 2      | 16.2339        |
| 3      | 16.1898        |
| 4      | 16.1229        |

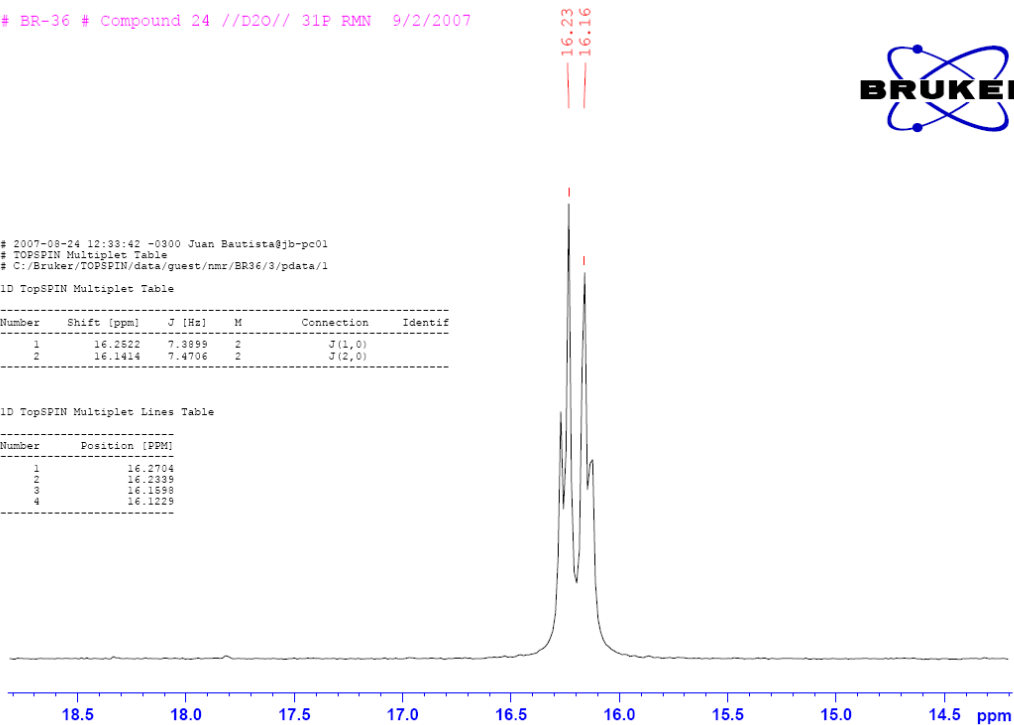

# BR-37 # //D2O//, (Ele.), 1H 26/02/07.

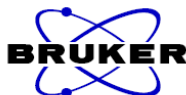

# 2007-02-27 15:05:53 -0300 Juan Bautista@jb-pc01  
# TOPSPIN Multiplet Table  
# C:/Bruker/TOPSPIN/data/guest/nmr/BR37/11/pdata/1

1D TopSPIN Multiplet Table

| Number | Shift [ppm] | J [Hz]   | M | Connection |
|--------|-------------|----------|---|------------|
| 1      | 3.3212      | 7.3455   | 2 | J(1,0)     |
|        |             | -6.9905  | 3 | J(1,0)     |
| 2      | 2.8407      | 7.0368   | 2 | J(2,0)     |
| 3      | 2.4038      | 7.3455   | 3 | J(3,0)     |
|        |             | -10.6015 | 3 | J(3,0)     |
| 4      | 1.9004      | 6.8208   | 7 | J(4,0)     |
| 5      | 0.8881      | 6.9516   | 2 | J(5,0)     |

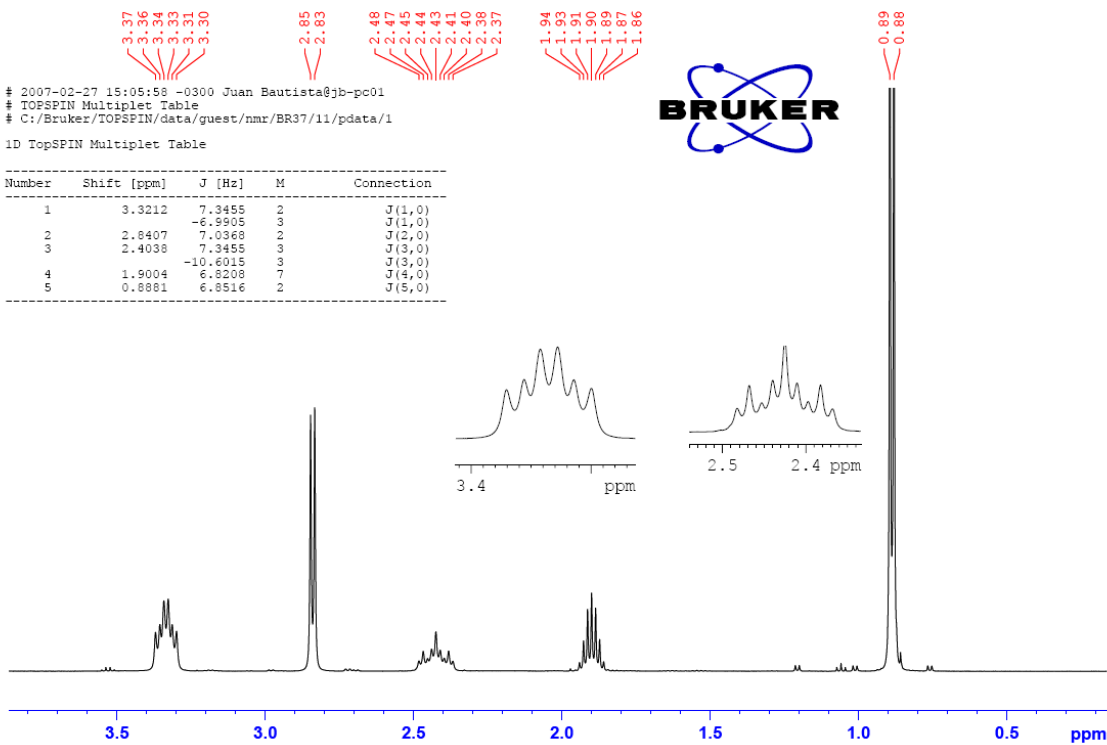

# BR-37 # //D2O// , (Ele.), 13C\* 26/02/07.

54.55

45.05

36.84

35.88

34.91

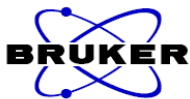

25.53

18.87

# 2007-02-27 14:41:15 -0300 Juan Bautista@jb-pc01  
# TOPSPIN Multiplet Table  
# C:/Bruker/TOPOSPIN/data/guest/nmr/BR37/2/pdata/1

1D TopSPIN Multiplet Table

| Number | Shift [ppm] | J [Hz]   | M | Connection | Identifier |
|--------|-------------|----------|---|------------|------------|
| 1      | 35.8738     | 121.1928 | 3 | J(1,0)     |            |

1D TopSPIN Multiplet Lines Table

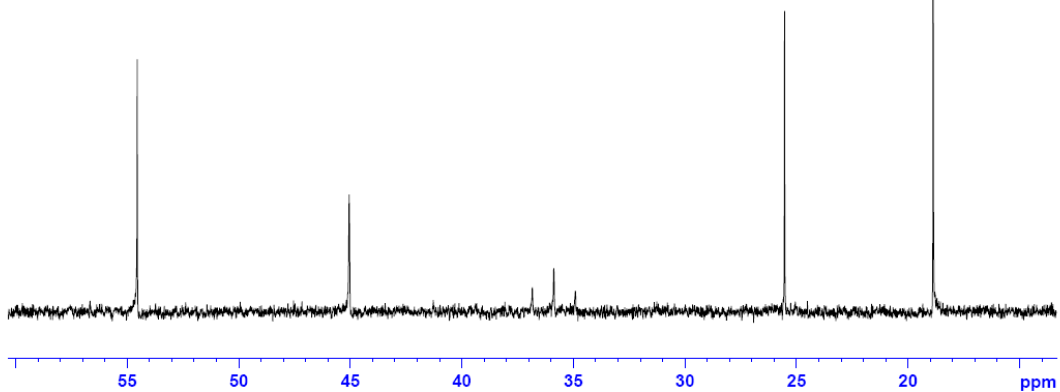

# BR-37 # //D2O// , (Ele.), 31P\* 26/02/07.

16.36

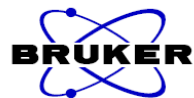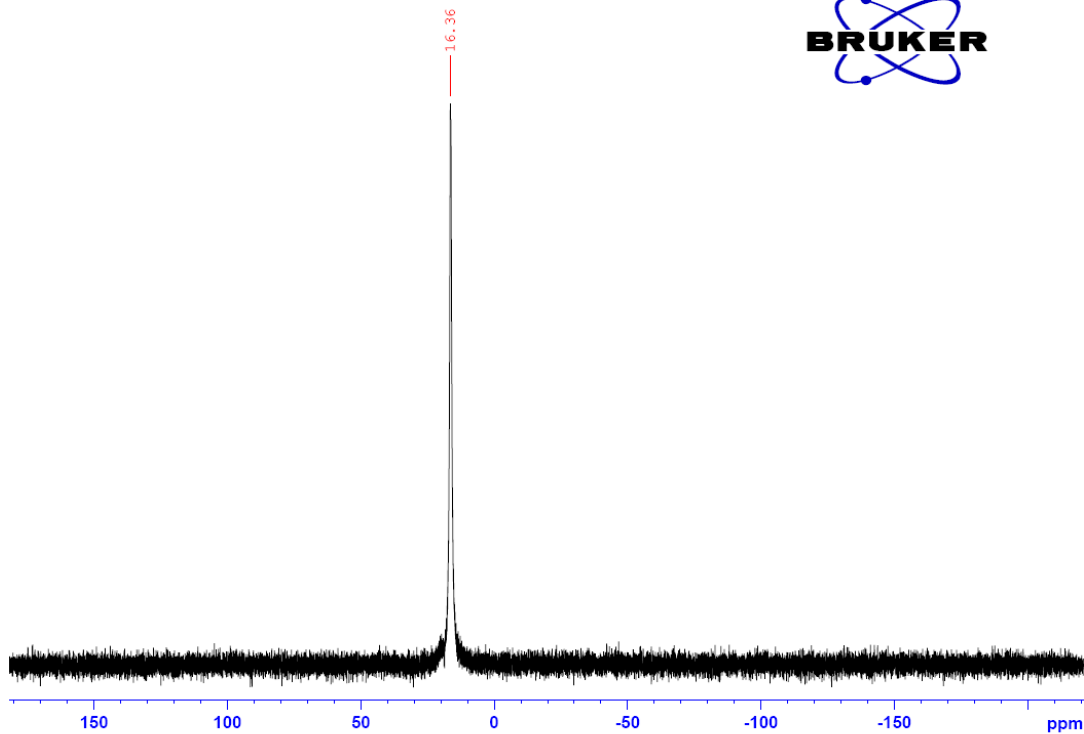

# BR-38-B# //D2O// , (Ele.), 1H 05/03/07.

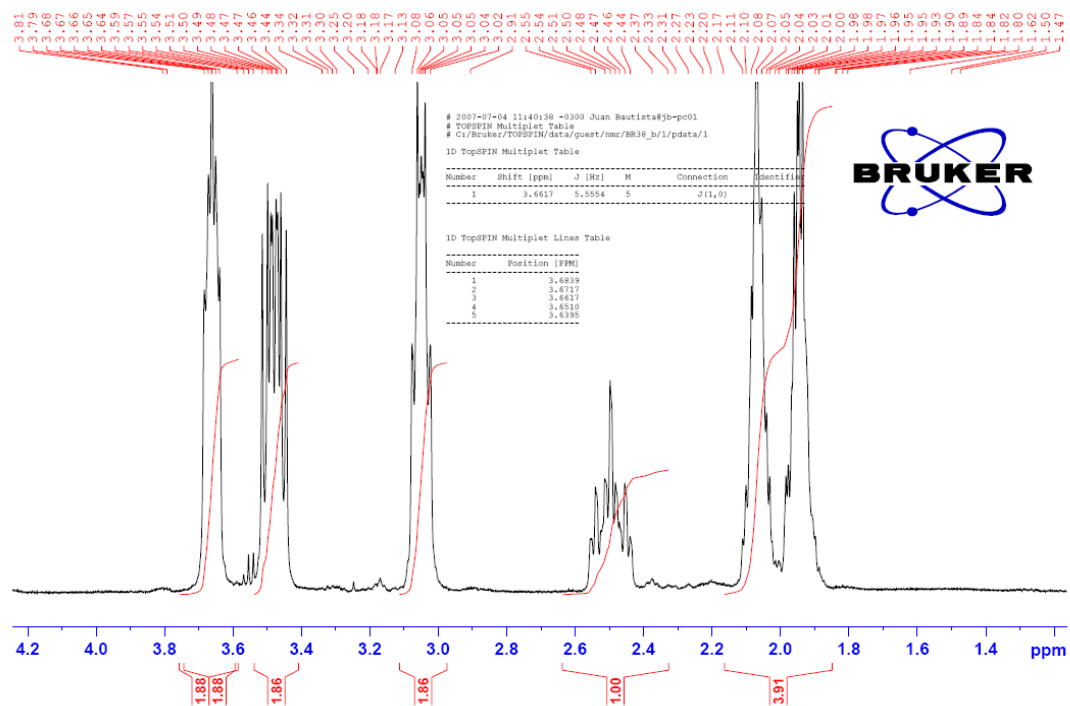

# BR-38 # //D2O// , 13C NMR 01/03/07.

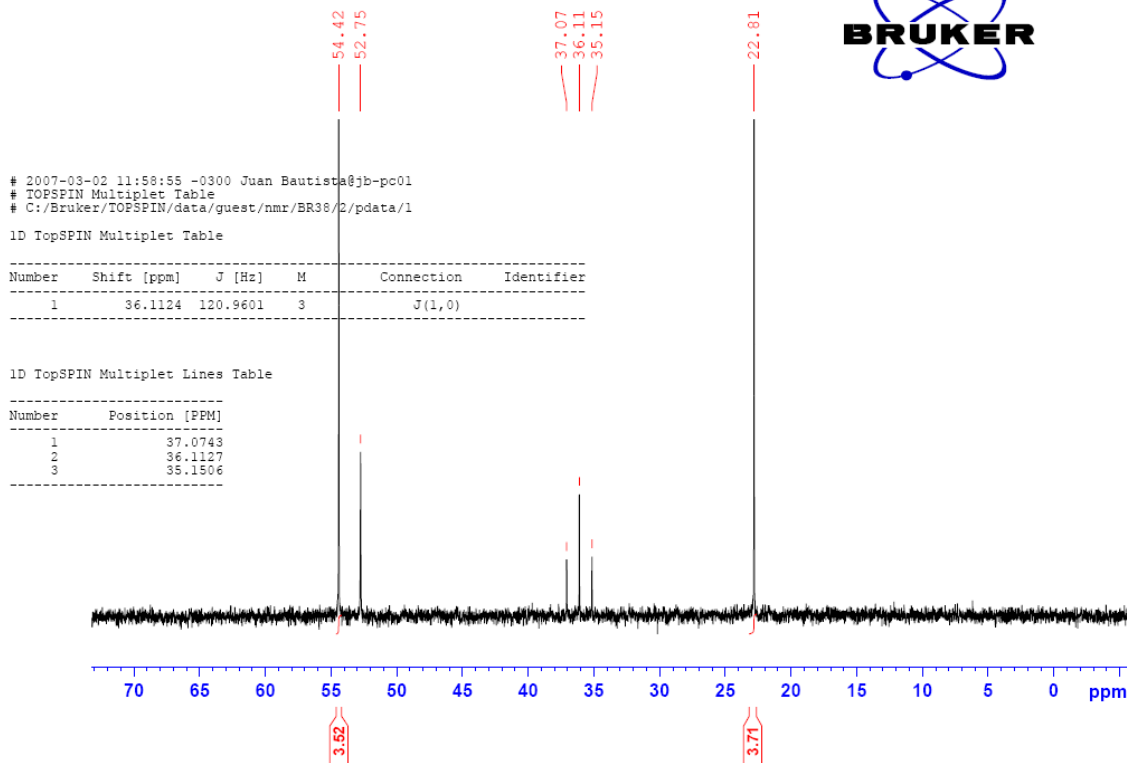

# BR-38-B # /compound 26 /D2O// 31P NMR 05/03/07.

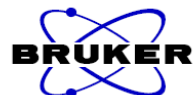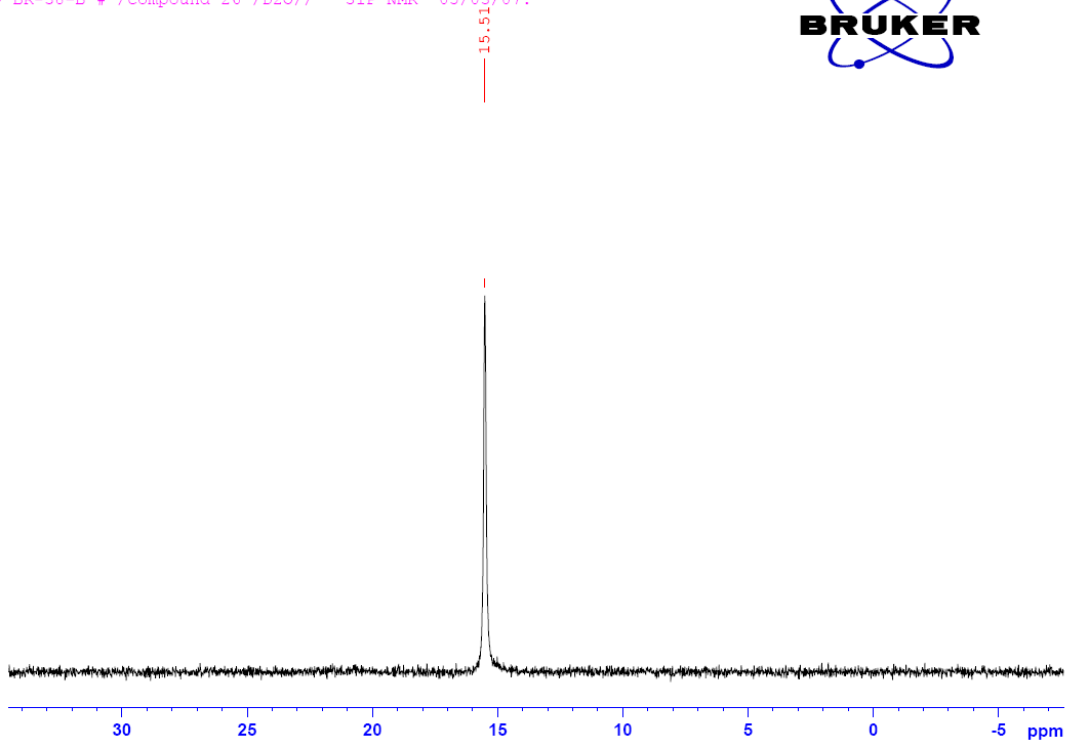

# BR-39 PURO # /D2O// 1H 13/06/07.

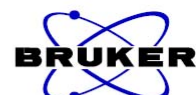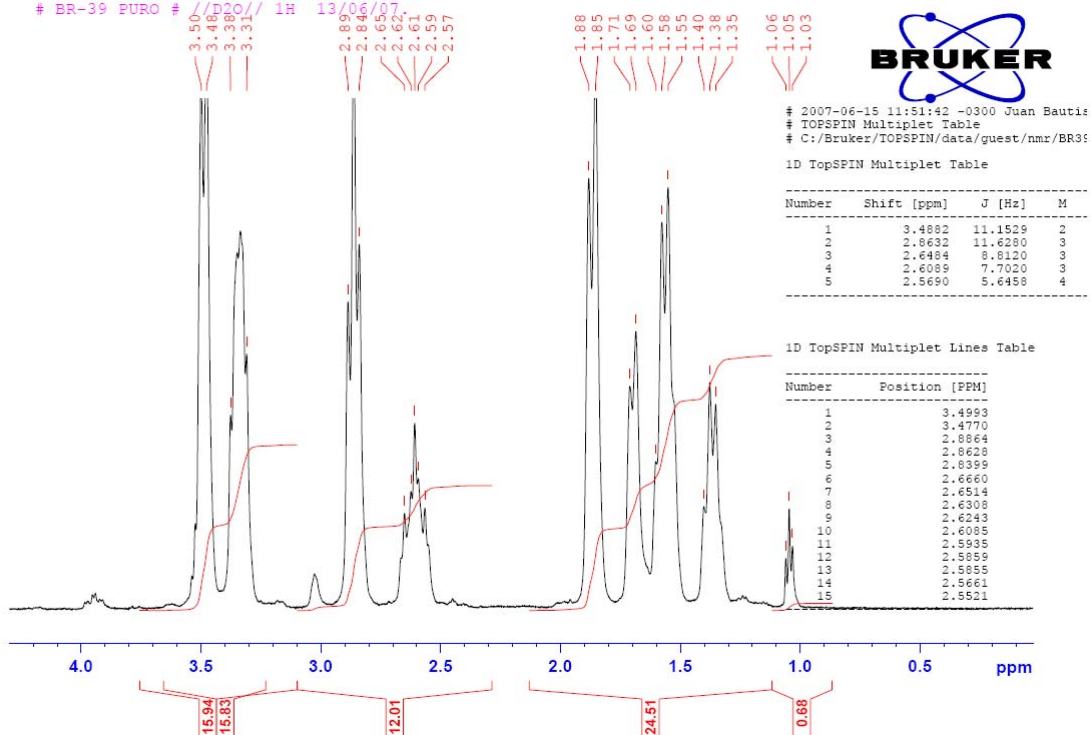

# BR-39 PURO # //D2O// 13C 13/06/07.

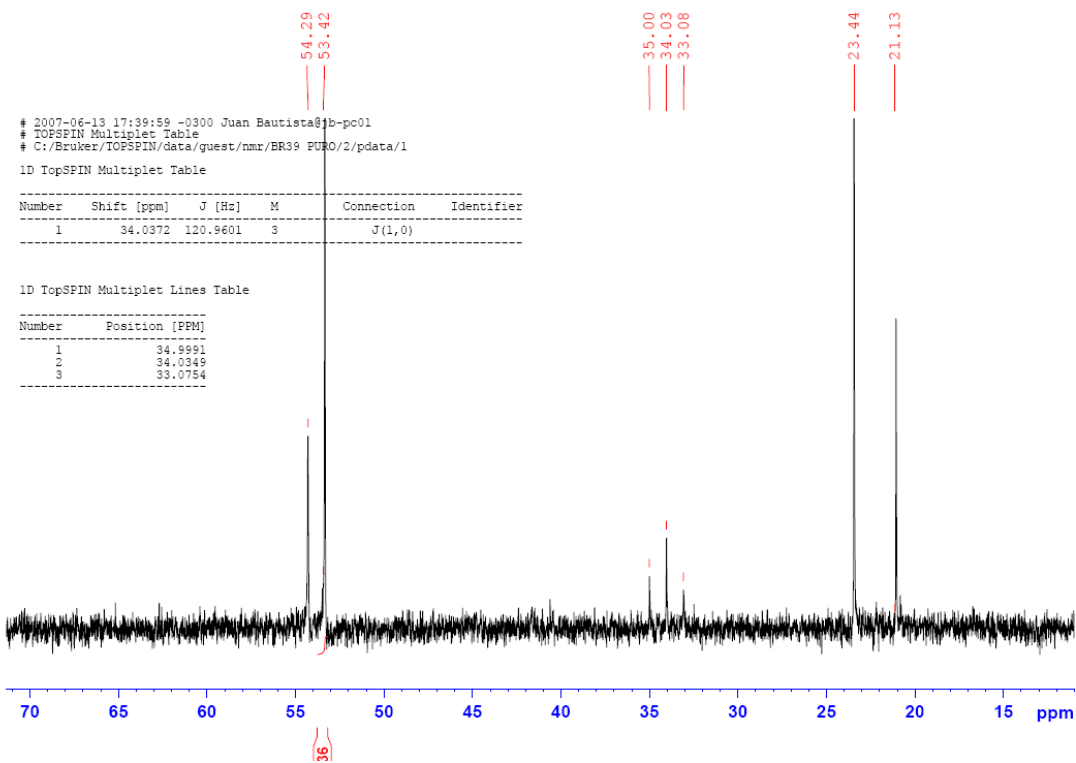

# BR-39 PURO # //D2O// 31P\* 13/06/07.

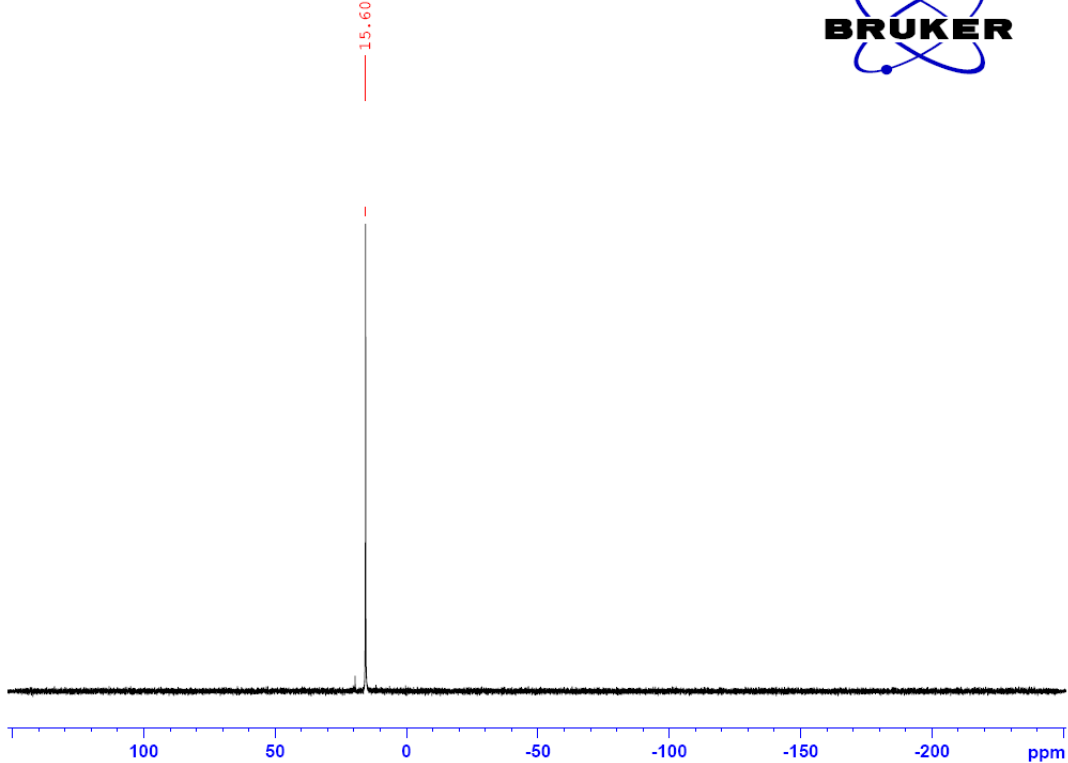

# ATLANTIC MICROLAB, INC.

Sample No. BR 25

SUBMITTER

P.O. Box 2288  
Norcross, Georgia 30091  
(770) 242-0082

Name JUAN B. RODRIGUEZ  
Address Dept. QUIMICA ORGANICA  
FCEYN-UBA, PAB 2  
CIUDAD UNIVERSITARIA  
Date Sept 28, 2006

| Element | Theory | Found |  | Single <input checked="" type="checkbox"/>                                                                                                                                                                                                                                                                                                                                                                                                                                                                                                              | Duplicate <input type="checkbox"/> |
|---------|--------|-------|--|---------------------------------------------------------------------------------------------------------------------------------------------------------------------------------------------------------------------------------------------------------------------------------------------------------------------------------------------------------------------------------------------------------------------------------------------------------------------------------------------------------------------------------------------------------|------------------------------------|
| C       | 24.30  | 24.01 |  | Elements Present: <u>C, H, N, O, P</u><br>Analyze for: <u>C, H, N</u><br>Hygroscopic <input checked="" type="checkbox"/> Explosive <input type="checkbox"/><br>M.P. _____ B.P. _____<br>To be dried: Yes <input checked="" type="checkbox"/> No <input type="checkbox"/><br>Temp. <u>45°C</u> Vac <u>yes</u> Time <u>2h</u><br>FAX Service <input checked="" type="checkbox"/><br>FAX Phone# <u>+54 11 45763385</u><br>Rush Service <input type="checkbox"/> (\$5/sample)<br>Phone Service <input type="checkbox"/> (\$5/phone call)<br>Phone No. _____ |                                    |
| H       | 6.12   | 6.12  |  |                                                                                                                                                                                                                                                                                                                                                                                                                                                                                                                                                         |                                    |
| N       | 5.67   | 5.70  |  |                                                                                                                                                                                                                                                                                                                                                                                                                                                                                                                                                         |                                    |
|         |        |       |  | Date Received <u>OCT 02 2006</u> Date Completed <u>OCT 03 2006</u>                                                                                                                                                                                                                                                                                                                                                                                                                                                                                      |                                    |

# ATLANTIC MICROLAB, INC.

UdA Buenos Aires

Sample No. BR 2

SUBMITTER

P.O. Box 2288  
Norcross, Georgia 30091  
(770) 242-0082

Name JUAN B. RODRIGUEZ  
Address Dept. QUIMICA ORGANICA  
FCEYN-UBA, PAB 2  
CIUDAD UNIVERSITARIA  
Date Sept 28, 2006

| Element | Theory | Found |  | Single <input checked="" type="checkbox"/>                                                                                                                                                                                                                                                                                                                                                                                                                                                                                                               | Duplicate <input type="checkbox"/> |
|---------|--------|-------|--|----------------------------------------------------------------------------------------------------------------------------------------------------------------------------------------------------------------------------------------------------------------------------------------------------------------------------------------------------------------------------------------------------------------------------------------------------------------------------------------------------------------------------------------------------------|------------------------------------|
| C       | 27.59  | 27.84 |  | Elements Present: <u>C, H, N, O, P</u><br>Analyze for: <u>C, H, N</u><br>Hygroscopic <input checked="" type="checkbox"/> Explosive <input type="checkbox"/><br>M.P. _____ B.P. _____<br>To be dried: Yes <input checked="" type="checkbox"/> No <input type="checkbox"/><br>Temp. <u>45°C</u> Vac <u>yes</u> Time <u>2h</u><br>FAX Service <input checked="" type="checkbox"/><br>FAX Phone# <u>+54 11 4576-3385</u><br>Rush Service <input type="checkbox"/> (\$5/sample)<br>Phone Service <input type="checkbox"/> (\$5/phone call)<br>Phone No. _____ |                                    |
| H       | 6.56   | 6.72  |  |                                                                                                                                                                                                                                                                                                                                                                                                                                                                                                                                                          |                                    |
| N       | 5.36   | 5.57  |  |                                                                                                                                                                                                                                                                                                                                                                                                                                                                                                                                                          |                                    |
|         |        |       |  | Date Received <u>OCT 02 2006</u> Date Completed <u>OCT 03 2006</u>                                                                                                                                                                                                                                                                                                                                                                                                                                                                                       |                                    |



## ATLANTIC MICROLAB, INC.

Sample No. BR 6

SUBMITTER

P.O. Box 2288  
Norcross, Georgia 30091  
(770) 242-0082

Name JUAN B. RODRIGUEZ  
Address Dept. QUIMICA ORGANICA  
FCEyN-UBA, PAB 2  
CIUDAD UNIVERSITARIA  
Date Sept. 22, 2006

| Element                  | Theory | Found |       | Single <input checked="" type="checkbox"/>                                         | Duplicate <input type="checkbox"/> |
|--------------------------|--------|-------|-------|------------------------------------------------------------------------------------|------------------------------------|
| C                        | 30.55  | 29.78 | 29.83 | Elements Present: <u>C, H, N, O, P</u>                                             |                                    |
| H                        | 6.96   | 6.86  | 6.88  | Analyze for: <u>C, H, N</u>                                                        |                                    |
| N                        | 5.09   | 4.33  | 5.06  | Hygroscopic <input checked="" type="checkbox"/> Explosive <input type="checkbox"/> |                                    |
| NO CHARGE FOR DUPLICATES |        |       |       | M.P. _____ B.P. _____                                                              |                                    |
|                          |        |       |       | To be dried: Yes <input checked="" type="checkbox"/> No <input type="checkbox"/>   |                                    |
|                          |        |       |       | Temp. <u>45°C</u> Vac. <u>yes</u> Time <u>2h</u>                                   |                                    |
|                          |        |       |       | FAX Service <input checked="" type="checkbox"/>                                    |                                    |
|                          |        |       |       | FAX Phone# <u>+5411 4576 3325</u>                                                  |                                    |
|                          |        |       |       | Rush Service <input type="checkbox"/> (\$5/sample)                                 |                                    |
|                          |        |       |       | Phone Service <input type="checkbox"/> (\$5/phone call)                            |                                    |
|                          |        |       |       | Phone No. _____                                                                    |                                    |

Date Received OCT 02 2006 Date Completed OCT 03 2006  
Remarks:

$2 \times 1 (H_2O)$        $C = 29.58$   
 $\frac{1}{2}$  de  $H_2O$        $H = 7.09$

## ATLANTIC MICROLAB, INC.

Sample No. BR 18

SUBMITTER

P.O. Box 2288  
Norcross, Georgia 30091  
(770) 242-0082

Name JUAN B. RODRIGUEZ  
Address Dept. QUIMICA ORGANICA  
FCEyN-UBA, PAB 2  
CIUDAD UNIVERSITARIA  
Date Sept. 22, 2006

| Element | Theory | Found |  | Single <input checked="" type="checkbox"/>                                         | Duplicate <input type="checkbox"/> |
|---------|--------|-------|--|------------------------------------------------------------------------------------|------------------------------------|
| C       | 33.22  | 33.39 |  | Elements Present: <u>C, H, N, O, P</u>                                             |                                    |
| H       | 7.32   | 7.13  |  | Analyze for: <u>C, H, N</u>                                                        |                                    |
| N       | 4.84   | 4.95  |  | Hygroscopic <input checked="" type="checkbox"/> Explosive <input type="checkbox"/> |                                    |
|         |        |       |  | M.P. _____ B.P. _____                                                              |                                    |
|         |        |       |  | To be dried: Yes <input checked="" type="checkbox"/> No <input type="checkbox"/>   |                                    |
|         |        |       |  | Temp. <u>45°C</u> Vac. <u>yes</u> Time <u>2h</u>                                   |                                    |
|         |        |       |  | FAX Service <input checked="" type="checkbox"/>                                    |                                    |
|         |        |       |  | FAX Phone# <u>+5411 4576 3325</u>                                                  |                                    |
|         |        |       |  | Rush Service <input type="checkbox"/> (\$5/sample)                                 |                                    |
|         |        |       |  | Phone Service <input type="checkbox"/> (\$5/phone call)                            |                                    |
|         |        |       |  | Phone No. _____                                                                    |                                    |

Date Received OCT 02 2006 Date Completed OCT 03 2006



## ATLANTIC MICROLAB, INC.

Sample No. BR 11

SUBMITTER

P.O. Box 2288  
Norcross, Georgia 30091  
(770) 242-0082

Name JUAN B. RODRIGUEZ  
Address DEPT. QUIMICA ORGANICA  
FCEyN-UBA PAB 2  
CIUDAD UNIVERSITARIA  
Date Sept 28, 2006

| Element | Theory | Found |  | Single <input checked="" type="checkbox"/> Duplicate <input type="checkbox"/><br>Elements Present: <u>C, H, N, O, P.</u><br>Analyze for: <u>C, H, N</u><br>Hygroscopic <input checked="" type="checkbox"/> Explosive <input type="checkbox"/><br>M.P. _____ B.P. _____<br>To be dried: Yes <input checked="" type="checkbox"/> No <input type="checkbox"/><br>Temp. <u>40°C</u> Vac. <input checked="" type="checkbox"/> Time <u>2 h.</u><br>FAX Service <input checked="" type="checkbox"/> FAX Phone: <u>+54 11 4576 3385</u><br>Rush Service <input type="checkbox"/> (\$5/sample)<br>Phone Service <input type="checkbox"/> (\$5/phone call)<br>Phone No. _____ |
|---------|--------|-------|--|---------------------------------------------------------------------------------------------------------------------------------------------------------------------------------------------------------------------------------------------------------------------------------------------------------------------------------------------------------------------------------------------------------------------------------------------------------------------------------------------------------------------------------------------------------------------------------------------------------------------------------------------------------------------|
| C       | 35.65  | 35.38 |  |                                                                                                                                                                                                                                                                                                                                                                                                                                                                                                                                                                                                                                                                     |
| H       | 7.65   | 7.59  |  |                                                                                                                                                                                                                                                                                                                                                                                                                                                                                                                                                                                                                                                                     |
| N       | 4.62   | 4.80  |  |                                                                                                                                                                                                                                                                                                                                                                                                                                                                                                                                                                                                                                                                     |
|         |        |       |  |                                                                                                                                                                                                                                                                                                                                                                                                                                                                                                                                                                                                                                                                     |
|         |        |       |  |                                                                                                                                                                                                                                                                                                                                                                                                                                                                                                                                                                                                                                                                     |

Date Received OCT 02 2006 Date Completed OCT 03 2006

## ATLANTIC MICROLAB, INC.

Sample No. BR34

SUBMITTER

P.O. Box 2288  
Norcross, Georgia 30091  
(770) 242-0082

[www.atlanticmicrolab.com](http://www.atlanticmicrolab.com)

PROFESSOR/SUPERVISOR:  
P.O. #:

Company / School Universidad de Buenos Aires  
Address Departamento de Química Orgánica, FCEyN  
Pabellon 2, Ciudad Universitaria, C1428EHA  
Buenos Aires, Argentina

NAME Juan Bautista Rodriguez DATE July 5, 2007

| Element | Theory  | Found |  | Single <input checked="" type="checkbox"/> Duplicate <input type="checkbox"/><br>Elements Present: <u>C, H, N, O, P</u><br>Analyze for: <u>C, H, N</u><br>Hygroscopic <input type="checkbox"/> Explosive <input type="checkbox"/><br>M.P. _____ B.P. _____<br>To be dried: Yes <input checked="" type="checkbox"/> No <input type="checkbox"/><br>Temp. <u>45°C</u> Vac. <input checked="" type="checkbox"/> Time <u>2 h</u><br>FAX Service <input checked="" type="checkbox"/> EMAIL Service <input type="checkbox"/><br>FAX # /EMAIL <u>+54 11 4576-3385</u><br>Rush Service <input type="checkbox"/> (SEE CURRENT<br>Phone Service <input type="checkbox"/> PRICE LIST)<br>Phone No. _____ |
|---------|---------|-------|--|-----------------------------------------------------------------------------------------------------------------------------------------------------------------------------------------------------------------------------------------------------------------------------------------------------------------------------------------------------------------------------------------------------------------------------------------------------------------------------------------------------------------------------------------------------------------------------------------------------------------------------------------------------------------------------------------------|
| C       | 37.8600 | 37.69 |  |                                                                                                                                                                                                                                                                                                                                                                                                                                                                                                                                                                                                                                                                                               |
| H       | 7.9400  | 7.85  |  |                                                                                                                                                                                                                                                                                                                                                                                                                                                                                                                                                                                                                                                                                               |
| N       | 4.4100  | 4.40  |  |                                                                                                                                                                                                                                                                                                                                                                                                                                                                                                                                                                                                                                                                                               |
|         |         |       |  |                                                                                                                                                                                                                                                                                                                                                                                                                                                                                                                                                                                                                                                                                               |
|         |         |       |  |                                                                                                                                                                                                                                                                                                                                                                                                                                                                                                                                                                                                                                                                                               |

Date Received AUG 10 2007 Date Completed AUG 13 2007  
Remarks:

## ATLANTIC MICROLAB, INC.

Sample No. BR 29

SUBMITTER

P.O. Box 2288  
Norcross, Georgia 30091  
(770) 242-0082

Name JUAN B. RODRIGUEZ  
Address Dept QUIMICA ORGANICA  
FCEYN-UBA PAB 2  
CIUDAD UNIVERSITARIA  
Date Sept. 28, 2006

| Element                          | Theory | Found |  | Single <input checked="" type="checkbox"/>                                         | Duplicate <input type="checkbox"/> |
|----------------------------------|--------|-------|--|------------------------------------------------------------------------------------|------------------------------------|
| C                                | 30.55  | 30.79 |  | Elements Present: <u>C, H, N, O, P</u>                                             |                                    |
| H                                | 6.96   | 6.96  |  | Analyze for: <u>C, H, N</u>                                                        |                                    |
| N                                | 5.09   | 5.08  |  | Hygroscopic <input checked="" type="checkbox"/> Explosive <input type="checkbox"/> |                                    |
|                                  |        |       |  | M P _____ B P _____                                                                |                                    |
|                                  |        |       |  | To be dried: Yes <input checked="" type="checkbox"/> No <input type="checkbox"/>   |                                    |
|                                  |        |       |  | Temp <u>45°C</u> Vac <u>yes</u> Time <u>2h</u>                                     |                                    |
|                                  |        |       |  | FAX Service <input checked="" type="checkbox"/>                                    |                                    |
|                                  |        |       |  | FAX Phone# <u>+54 11 4576 3385</u>                                                 |                                    |
|                                  |        |       |  | Rush Service <input type="checkbox"/> (\$5/sample)                                 |                                    |
|                                  |        |       |  | Phone Service <input type="checkbox"/> (\$5/phone call)                            |                                    |
|                                  |        |       |  | Phone No _____                                                                     |                                    |
| Data Received <u>OCT 02 2006</u> |        |       |  | Date Completed <u>OCT 03 2006</u>                                                  |                                    |

## ATLANTIC MICROLAB, INC.

Sample No. BR 30

SUBMITTER

P.O. Box 2288  
Norcross, Georgia 30091  
(770) 242-0082

Name JUAN B. RODRIGUEZ  
Address Dept. QUIMICA ORGANICA  
FCEYN-UBA PAB 2  
CIUDAD UNIVERSITARIA  
Date Sept 28, 2006

| Element                          | Theory | Found |       | Single <input checked="" type="checkbox"/>                                         | Duplicate <input type="checkbox"/> |
|----------------------------------|--------|-------|-------|------------------------------------------------------------------------------------|------------------------------------|
| C                                | 27.59  | 27.21 | 27.08 | Elements Present: <u>C, H, N, O, P</u>                                             |                                    |
| H                                | 6.56   | 6.55  | 6.54  | Analyze for: <u>C, H, N</u>                                                        |                                    |
| N                                | 5.36   | 5.14  | 5.17  | Hygroscopic <input checked="" type="checkbox"/> Explosive <input type="checkbox"/> |                                    |
|                                  |        |       |       | M P _____ B P _____                                                                |                                    |
|                                  |        |       |       | To be dried: Yes <input checked="" type="checkbox"/> No <input type="checkbox"/>   |                                    |
|                                  |        |       |       | Temp <u>45°C</u> Vac <u>yes</u> Time <u>2h</u>                                     |                                    |
|                                  |        |       |       | FAX Service <input checked="" type="checkbox"/>                                    |                                    |
|                                  |        |       |       | FAX Phone# <u>+54 11 4576 3385</u>                                                 |                                    |
|                                  |        |       |       | Rush Service <input type="checkbox"/> (\$5/sample)                                 |                                    |
|                                  |        |       |       | Phone Service <input type="checkbox"/> (\$5/phone call)                            |                                    |
|                                  |        |       |       | Phone No _____                                                                     |                                    |
| Data Received <u>OCT 02 2006</u> |        |       |       | Date Completed <u>OCT 03 2006</u>                                                  |                                    |

NO CHARGE FOR DUPLICATES



## ATLANTIC MICROLAB, INC.

Sample No. BR 28

SUBMITTER

P.O. Box 2288  
Norcross, Georgia 30091  
(770) 242-0082

Name JUAN B. RODRIGUEZ  
Address Dept. QUIMICA ORGANICA  
FCEyN Universidad de Buenos  
Aires, Pab 2 Ciudad Univ.  
Date Sept. 28, 2006

| Element | Theory | Found | Single <input checked="" type="checkbox"/>                                                                                                                                                                                                                                                                                                                                                                                                                                                                                                             | Duplicate <input type="checkbox"/> |
|---------|--------|-------|--------------------------------------------------------------------------------------------------------------------------------------------------------------------------------------------------------------------------------------------------------------------------------------------------------------------------------------------------------------------------------------------------------------------------------------------------------------------------------------------------------------------------------------------------------|------------------------------------|
| C       | 33.46  | 33.38 | Elements Present: <u>C, H, N, O, P</u><br>Analyze for: <u>C, H, N</u><br>Hygroscopic <input checked="" type="checkbox"/> Explosive <input type="checkbox"/><br>M.P. _____ B.P. _____<br>To be dried: Yes <input checked="" type="checkbox"/> No <input type="checkbox"/><br>Temp. <u>45°C</u> Vac. <u>yes</u> Time <u>2h</u><br>FAX Service <input checked="" type="checkbox"/> FAX Phone# <u>+54 11 4576 3385</u><br>Rush Service <input type="checkbox"/> (SEE SAMPLE)<br>Phone Service <input type="checkbox"/> (SEE PHONE CALL)<br>Phone No. _____ |                                    |
| H       | 6.67   | 6.64  |                                                                                                                                                                                                                                                                                                                                                                                                                                                                                                                                                        |                                    |
| N       | 4.88   | 5.01  |                                                                                                                                                                                                                                                                                                                                                                                                                                                                                                                                                        |                                    |

Date Received OCT 02 2006 Date Completed OCT 03 2006

## ATLANTIC MICROLAB, INC.

Sample No. BR35

SUBMITTER

P.O. Box 2288  
Norcross, Georgia 30091  
(770) 242-0082

Company / School: Universidad de Buenos Aires  
Address Departamento de Química Orgánica, FCEyN  
Pabellon 2, Ciudad Universitaria, C1428EHA  
Buenos Aires, Argentina  
NAME Juan Bautista Rodriguez DATE July 5, 2007

[www.atlanticmicrolab.com](http://www.atlanticmicrolab.com)

PROFESSOR/SUPERVISOR:  
P.O. #:

| Element | Theory  | Found | Single <input checked="" type="checkbox"/>                                                                                                                                                                                                                                                                                                                                                                                                                                                                                                                                        | Duplicate <input type="checkbox"/> |
|---------|---------|-------|-----------------------------------------------------------------------------------------------------------------------------------------------------------------------------------------------------------------------------------------------------------------------------------------------------------------------------------------------------------------------------------------------------------------------------------------------------------------------------------------------------------------------------------------------------------------------------------|------------------------------------|
| C       | 24.3000 | 24.50 | Elements Present: <u>C, H, N, O, P</u><br>Analyze for: <u>C, H, N</u><br>Hygroscopic <input type="checkbox"/> Explosive <input type="checkbox"/><br>M.P. _____ B.P. _____<br>To be dried: Yes <input checked="" type="checkbox"/> No <input type="checkbox"/><br>Temp. <u>45°C</u> Vac. <u>yes</u> Time <u>2h</u><br>FAX Service <input checked="" type="checkbox"/> EMAIL Service <input type="checkbox"/><br>FAX# /EMAIL <u>+54 11 4576 3385</u><br>Rush Service <input type="checkbox"/> (SEE CURRENT<br>Phone Service <input type="checkbox"/> PRICE LIST)<br>Phone No. _____ |                                    |
| H       | 6.1200  | 6.27  |                                                                                                                                                                                                                                                                                                                                                                                                                                                                                                                                                                                   |                                    |
| N       | 5.6700  | 5.74  |                                                                                                                                                                                                                                                                                                                                                                                                                                                                                                                                                                                   |                                    |

Date Received AUG 10 2007 Date Completed AUG 13 2007  
Remarks: \_\_\_\_\_

## ATLANTIC MICROLAB, INC.

Sample No. BR36

P.O. Box 2288  
Norcross, Georgia 30091  
(770) 242-0082

[www.atlanticmicrolab.com](http://www.atlanticmicrolab.com)

PROFESSOR/SUPERVISOR:  
P.O. #:

### SUBMITTER

Company / School Universidad de Buenos Aires

Address Departamento de Química Orgánica, FCEyN

Pabellon 2, Ciudad Universitaria, C1428EHA

Buenos Aires, Argentina

NAME Juan Bautista Rodriguez DATE July 5, 2007

| Element | Theory  | Found |  | Single <input checked="" type="checkbox"/>                                                                                                   | Duplicate <input type="checkbox"/> |
|---------|---------|-------|--|----------------------------------------------------------------------------------------------------------------------------------------------|------------------------------------|
|         |         |       |  | Elements Present: C, H, N, O, P                                                                                                              |                                    |
| C       | 27.6000 | 27.81 |  | Analyze for: C, H, N                                                                                                                         |                                    |
| H       | 6.5600  | 6.65  |  | Hygroscopic <input type="checkbox"/> Explosive <input type="checkbox"/><br>M.P. _____ B.P. _____                                             |                                    |
| N       | 5.3600  | 5.44  |  | To be dried: Yes <input checked="" type="checkbox"/> No <input type="checkbox"/><br>Temp. 45 °C _____ Vac. <input type="checkbox"/> Time 2 h |                                    |
|         |         |       |  | FAX Service <input checked="" type="checkbox"/> EMAIL Service <input type="checkbox"/><br>FAX # /EMAIL +54 11 4576-3385                      |                                    |
|         |         |       |  | Rush Service <input type="checkbox"/> (SEE CURRENT<br>Phone Service <input type="checkbox"/> PRICE LIST)<br>Phone No. _____                  |                                    |

Date Received AUG 10 2007  
Remarks:

Date Completed AUG 13 2007

## ATLANTIC MICROLAB, INC.

Sample No. BR37

P.O. Box 2288  
Norcross, Georgia 30091  
(770) 242-0082

[www.atlanticmicrolab.com](http://www.atlanticmicrolab.com)

PROFESSOR/SUPERVISOR:  
P.O. #:

### SUBMITTER

Company / School Universidad de Buenos Aires

Address Departamento de Química Orgánica, FCEyN

Pabellon 2, Ciudad Universitaria, C1428EHA

Buenos Aires, Argentina

NAME Juan Bautista Rodriguez DATE July 5, 2007

| Element | Theory  | Found |  | Single <input checked="" type="checkbox"/>                                                                                                   | Duplicate <input type="checkbox"/> |
|---------|---------|-------|--|----------------------------------------------------------------------------------------------------------------------------------------------|------------------------------------|
|         |         |       |  | Elements Present: C, H, N, O, P                                                                                                              |                                    |
| C       | 27.6000 | 27.31 |  | Analyze for: C, H, N                                                                                                                         |                                    |
| H       | 6.5600  | 6.50  |  | Hygroscopic <input type="checkbox"/> Explosive <input type="checkbox"/><br>M.P. _____ B.P. _____                                             |                                    |
| N       | 5.3600  | 5.20  |  | To be dried: Yes <input checked="" type="checkbox"/> No <input type="checkbox"/><br>Temp. 45 °C _____ Vac. <input type="checkbox"/> Time 2 h |                                    |
|         |         |       |  | FAX Service <input checked="" type="checkbox"/> EMAIL Service <input type="checkbox"/><br>FAX # /EMAIL +54 11 4576-3385                      |                                    |
|         |         |       |  | Rush Service <input type="checkbox"/> (SEE CURRENT<br>Phone Service <input type="checkbox"/> PRICE LIST)<br>Phone No. _____                  |                                    |

Date Received AUG 10 2007  
Remarks:

Date Completed AUG 13 2007

## ATLANTIC MICROLAB, INC.

Sample No. BR38

P.O. Box 2288  
Norcross, Georgia 30091  
(770) 242-0082

[www.atlanticmicrolab.com](http://www.atlanticmicrolab.com)

PROFESSOR/SUPERVISOR:  
P.O. #:

### SUBMITTER

Company / School Universidad de Buenos Aires  
Address Departamento de Química Orgánica, FCEyN

Pabellon 2, Ciudad Universitaria, C1428EHA

Buenos Aires, Argentina

NAME Juan Bautista Rodriguez DATE July 5, 2007

| Element                                                                                                                                     | Theory  | Found |      | Single <input checked="" type="checkbox"/> Duplicate <input type="checkbox"/>                    |  |
|---------------------------------------------------------------------------------------------------------------------------------------------|---------|-------|------|--------------------------------------------------------------------------------------------------|--|
|                                                                                                                                             |         |       |      |                                                                                                  |  |
| C                                                                                                                                           | 27.8100 | 24.80 | 24.7 | Elements Present: C, H, N, O, P                                                                  |  |
| H                                                                                                                                           | 5.8300  | 6.50  | 6.47 | Analyze for: C, H, N                                                                             |  |
| N                                                                                                                                           | 5.4100  | 4.84  | 4.66 | Hygroscopic <input type="checkbox"/> Explosive <input type="checkbox"/><br>M.P. _____ B.P. _____ |  |
| NO CHARGE FOR DUPLICATES                                                                                                                    |         |       |      |                                                                                                  |  |
| To be dried: Yes <input checked="" type="checkbox"/> No <input type="checkbox"/><br>Temp. 45°C _____ Vac. <input type="checkbox"/> Time 2 h |         |       |      |                                                                                                  |  |
| FAX Service <input checked="" type="checkbox"/> EMAIL Service <input type="checkbox"/><br>FAX# /EMAIL +54 11 4576-3385                      |         |       |      |                                                                                                  |  |
| Rush Service <input type="checkbox"/> (SEE CURRENT PRICE LIST)                                                                              |         |       |      |                                                                                                  |  |
| Phone Service <input type="checkbox"/> Phone No. _____                                                                                      |         |       |      |                                                                                                  |  |

Date Received \_\_\_\_\_  
Remarks:

AUG 10 2007

Date Completed

AUG 13 2007

## ATLANTIC MICROLAB, INC.

Sample No. BR39

P.O. Box 2288  
Norcross, Georgia 30091  
(770) 242-0082

[www.atlanticmicrolab.com](http://www.atlanticmicrolab.com)

PROFESSOR/SUPERVISOR:  
P.O. #:

### SUBMITTER

Company / School Universidad de Buenos Aires

Address Departamento de Química Orgánica, FCEyN

Pabellon 2, Ciudad Universitaria, C1428EHA

Buenos Aires, Argentina

NAME Juan Bautista Rodriguez DATE July 5, 2007

| Element                                                                                                                                     | Theory  | Found |       | Single <input checked="" type="checkbox"/> Duplicate <input type="checkbox"/>                    |  |
|---------------------------------------------------------------------------------------------------------------------------------------------|---------|-------|-------|--------------------------------------------------------------------------------------------------|--|
|                                                                                                                                             |         |       |       |                                                                                                  |  |
| C                                                                                                                                           | 30.7800 | 30.33 | 30.29 | Elements Present: C, H, N, O, P                                                                  |  |
| H                                                                                                                                           | 6.2700  | 6.30  | 6.26  | Analyze for: C, H, N                                                                             |  |
| N                                                                                                                                           | 5.1300  | 4.99  | 4.94  | Hygroscopic <input type="checkbox"/> Explosive <input type="checkbox"/><br>M.P. _____ B.P. _____ |  |
| NO CHARGE FOR DUPLICATES                                                                                                                    |         |       |       |                                                                                                  |  |
| To be dried: Yes <input checked="" type="checkbox"/> No <input type="checkbox"/><br>Temp. 45°C _____ Vac. <input type="checkbox"/> Time 2 h |         |       |       |                                                                                                  |  |
| FAX Service <input checked="" type="checkbox"/> EMAIL Service <input type="checkbox"/><br>FAX# /EMAIL +54 11 4576-3385                      |         |       |       |                                                                                                  |  |
| Rush Service <input type="checkbox"/> (SEE CURRENT PRICE LIST)                                                                              |         |       |       |                                                                                                  |  |
| Phone Service <input type="checkbox"/> Phone No. _____                                                                                      |         |       |       |                                                                                                  |  |

Date Received \_\_\_\_\_  
Remarks:

AUG 10 2007

Date Completed

AUG 13 2007
